# Supplementary material
Source: PubMed Central journal article supplement (PMC9758389)
Supplement: mmc1.pdf [file mmc1.pdf]

Supplementary information  
**Rigorous quantification of the statistical significance of COVID-19  
lockdown effect on air quality: The case from ground-based  
measurements in Ontario, Canada**

Hind A. Al-Abadleh,<sup>ξ\*</sup> Martin Lysy,<sup>+\*</sup> Lucas Neil,<sup>§</sup> Priyesh Patel,<sup>ξ</sup>  
Wisam Mohammed,<sup>ξ</sup> and Yara Khalaf<sup>ξ</sup>

<sup>ξ</sup> Department of Chemistry and Biochemistry, Wilfrid Laurier University, Waterloo, Ontario  
N2L 3C5, Canada. <sup>+</sup> Department of Statistics and Actuarial Science, University of Waterloo,  
Waterloo, Ontario N2L 3G1, Canada. <sup>§</sup> Hemmera Envirochem Inc., Oakville, Ontario L6J 7W5,  
Canada.

**Table of Content** (prepared January 30, 2021):

|                                           |    |
|-------------------------------------------|----|
| <b>Table S1.</b>                          | 2  |
| <b>Figure S1.</b>                         | 4  |
| <b>Figure S2.</b>                         | 5  |
| <b>Figure S3.</b>                         | 8  |
| <b>Figure S4.</b>                         | 9  |
| <b>Figure S5.</b>                         | 10 |
| <b>Figure S6.</b>                         | 11 |
| <b>Figure S7.</b>                         | 12 |
| <b>Table S2.</b>                          | 13 |
| <b>Table S3.</b>                          | 15 |
| <b>Table S4.</b>                          | 16 |
| <b>Table S5.</b>                          | 17 |
| <b>Table S6.</b>                          | 19 |
| <b>Table S7.</b>                          | 20 |
| <b>Table S8.</b>                          | 21 |
| <b>Table S9.</b>                          | 22 |
| <b>Table S10.</b>                         | 23 |
| <b>Table S11.</b>                         | 24 |
| <b>Table S12.</b>                         | 26 |
| <b>Table S13.</b>                         | 27 |
| <b>Table S14.</b>                         | 28 |
| <b>Table S15.</b>                         | 29 |
| <b>Table S16.</b>                         | 30 |
| <b>Table S17.</b>                         | 31 |
| <b>Table S18.</b>                         | 34 |
| <b>Table S19.</b>                         | 35 |
| <b>Table S20.</b>                         | 36 |
| <b>Additional information on Methods.</b> | 38 |
| <b>References.</b>                        | 39 |

**Table S1.** Timeline of COVID-19 related restrictions in Ontario (ON), Canada, Michigan (MI), and Ohio (OH) in the U.S. Shaded rows refer to U.S. states.

| Date in 2020 | Province/State | Event                                                                                                                                           |
|--------------|----------------|-------------------------------------------------------------------------------------------------------------------------------------------------|
| Mar-17       | ON             | State of emergency in Ontario while ordering some business to be closed, including daycares, bars and restaurants, theatres and private schools |
| Mar-22       | OH             | State-wide stay at home order and in effect until May 1, then extended to May 29.                                                               |
| Mar-23       | MI             | State-wide stay at home order.                                                                                                                  |
|              | ON             | Closure of all non-essential businesses across the province for 14 days.                                                                        |
| Apr-09       | MI             | Statewide stay at home order extended.                                                                                                          |
| Apr-24       | MI             | Non-essential retailers can reopen provided they follow strict guidelines or meet certain criteria.                                             |
| May-4        | OH             | Manufacturing, construction and distribution can reopen.                                                                                        |
| May-11       | MI             | Manufacturers to return to work.                                                                                                                |
| May-15       | OH             | Various businesses are allowed to open provided they follow strict guidelines or meet certain criteria.                                         |
| May-19       | ON             | Various businesses are allowed to open provided they follow strict guidelines or meet certain criteria (this continues throughout the month)    |
| May-26       | OH             | Further opening of businesses, including recreational facilities and activities.                                                                |
| Jun-01       | MI             | Stay at home order rescinded and entire state moved to Phase 4 of reopening.                                                                    |
| Jun-08       | ON             | Some regions start Phase 2 re-opening.                                                                                                          |
| Jun-15       | ON             | Durham, Halton, Haldimand-Norfolk, Hamilton, Lambton, Niagara, and York health regions enter Stage 2.                                           |
| Jun-19       | MI             | Final stay at home order expires.                                                                                                               |
| Jun-24       | ON             | Peel and Toronto enter Stage 2.                                                                                                                 |
| Jun-25       | ON             | Most of Windsor-Essex enter Stage 2, excluding Kingsville and Leamington.                                                                       |
| Aug-12       | ON             | All regions in Ontario in Stage 3.                                                                                                              |
| Oct-10       | ON             | Some restrictions re-implemented in Ottawa, Peel, and Toronto regions.                                                                          |
| Oct-19       | ON             | Some restrictions re-implemented in York region.                                                                                                |
| Nov-17       | OH             | Formal announcement on state-wide "slow down".                                                                                                  |
| Nov-18       | MI             | Orders the closure of several businesses and public services, including high schools and universities, for three weeks.                         |
| Dec-07       | MI             | Partial shutdown on businesses extended                                                                                                         |
| Dec-10       | OH             | 'Slow down' extended into January                                                                                                               |
| Dec-26       | ON             | Province-wide lockdown                                                                                                                          |

As Ontario eased restrictions and more people returned to work, the services that they rely on (e.g., public transportation, childcare) needed to be made available. As a result, traffic and industrial activity slowly increased from Stage 1 to 2 through to Stage 3. For more detailed information on allowable activities in Stage 2 and 3, see the following links:

<https://www.ontario.ca/page/framework-reopening-our-province-stage-2>

<https://www.ontario.ca/page/framework-reopening-our-province-stage-3>

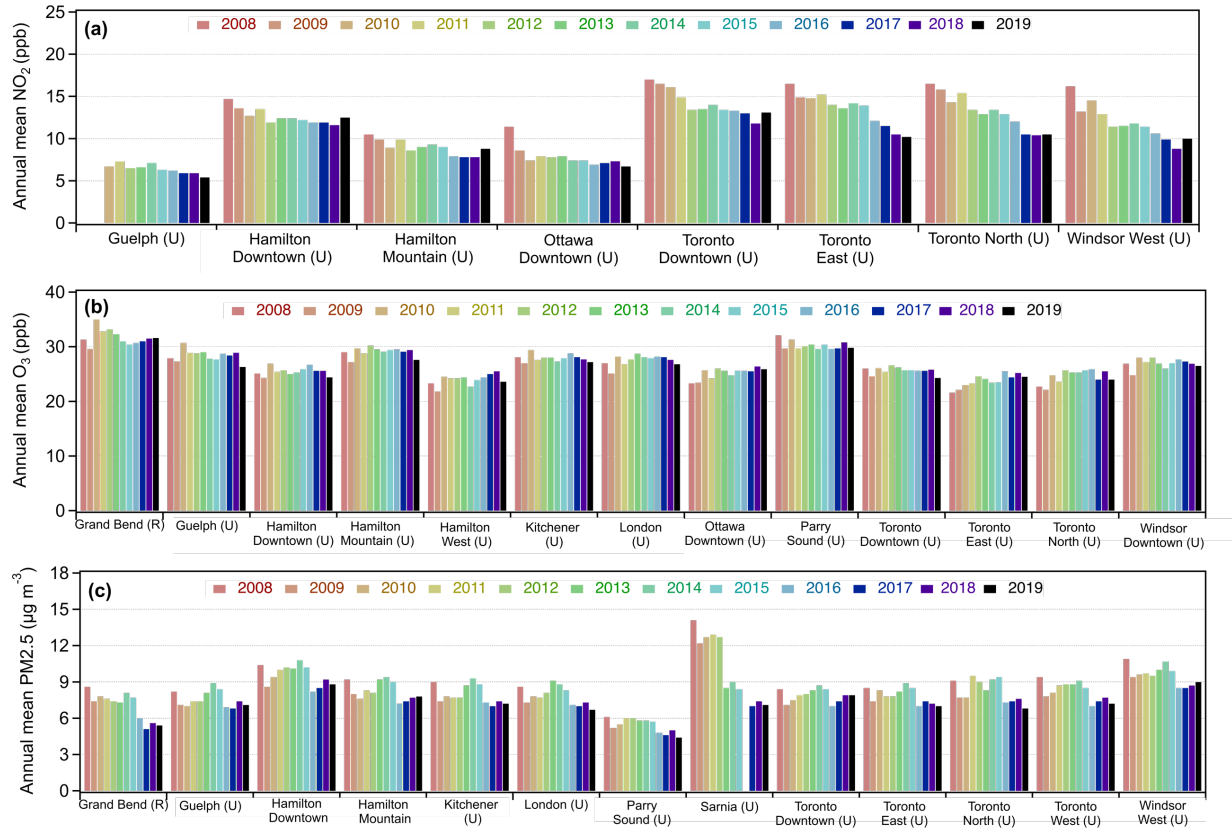

**Figure S1:** Eleven-year trends in air quality pollutant levels reported by MECP in selected cities in Southern Ontario. The population of these cities is listed in Table 1: (a) annual mean of NO<sub>2</sub> levels, (b) annual mean of O<sub>3</sub> levels, and (c) annual mean in PM<sub>2.5</sub> levels. Similar data for more cities are shown in Figure 1.

(a)

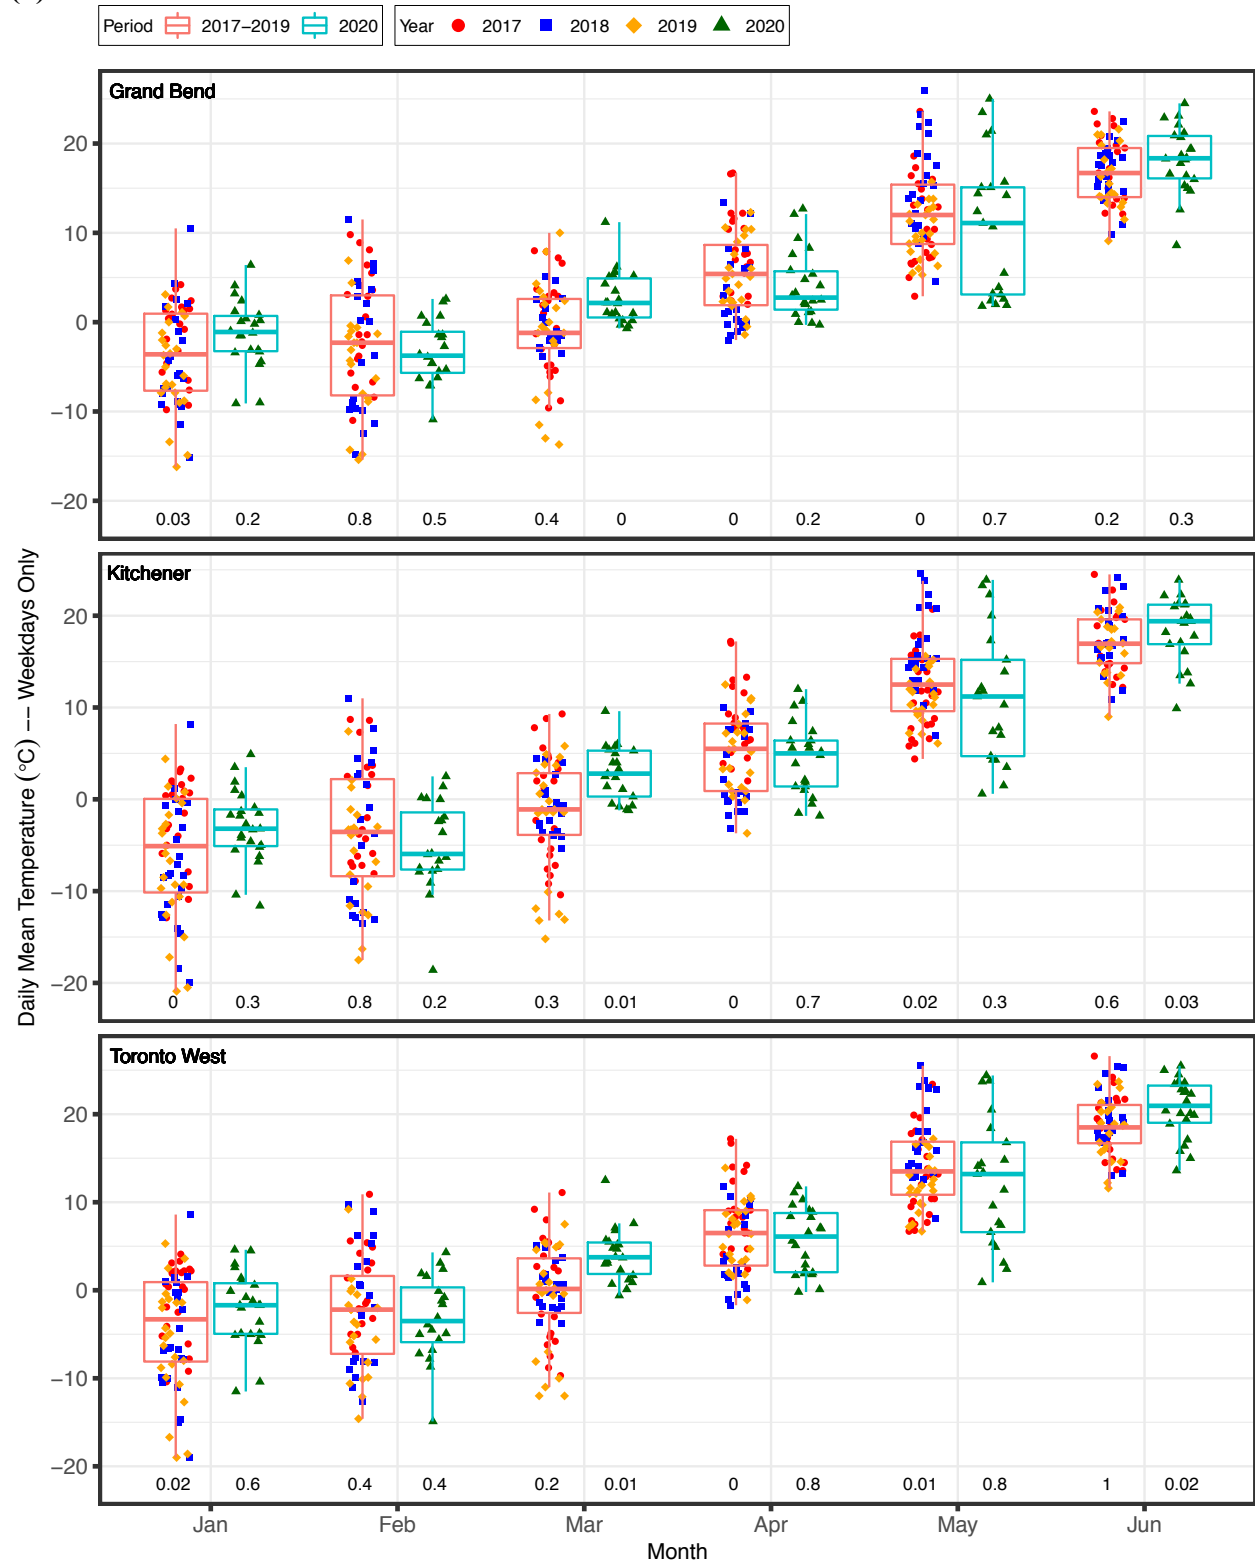

...Figure S2(b) next page/

(b)

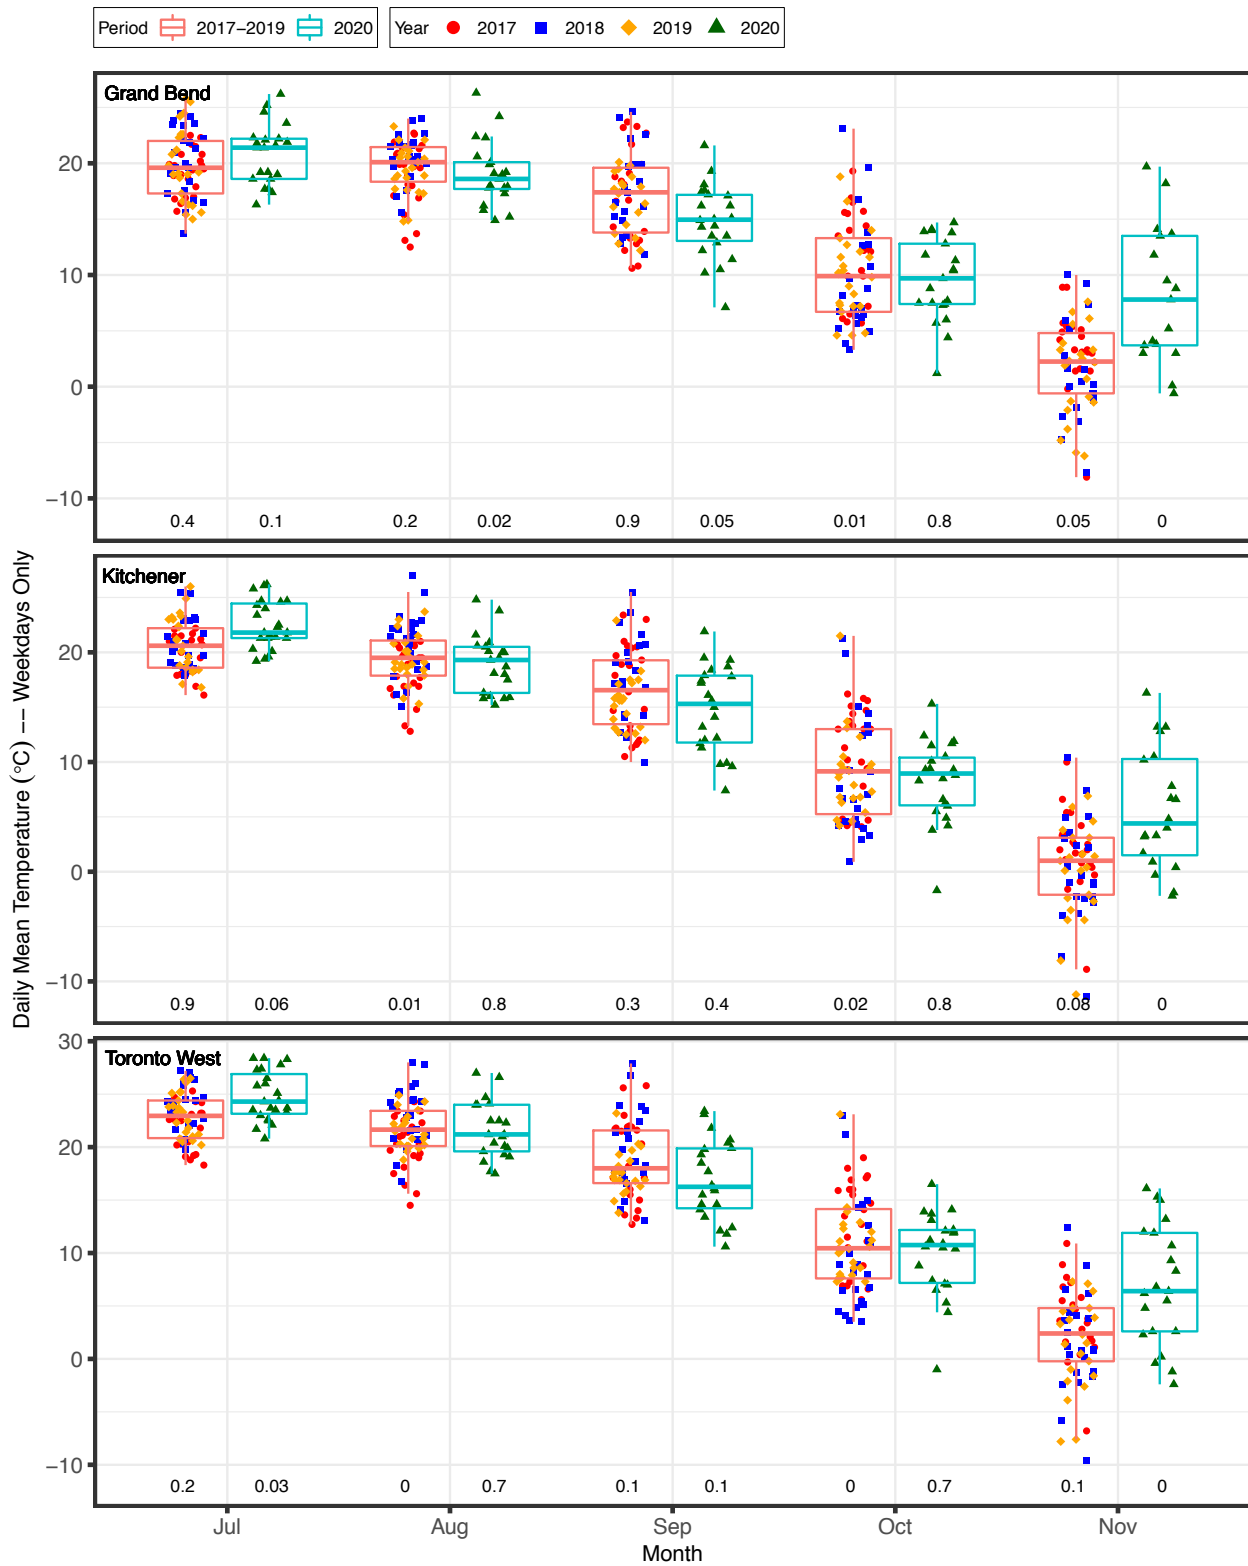

**Figure S2.** Box plots for the daily mean temperature per month over the 2017-2019 and 2020 periods for selected AQ stations in Southern Ontario, (a) Jan-Jun, and (b) July-Nov. Number below each data box corresponds to the calculated p-value. See text for details.

(a)

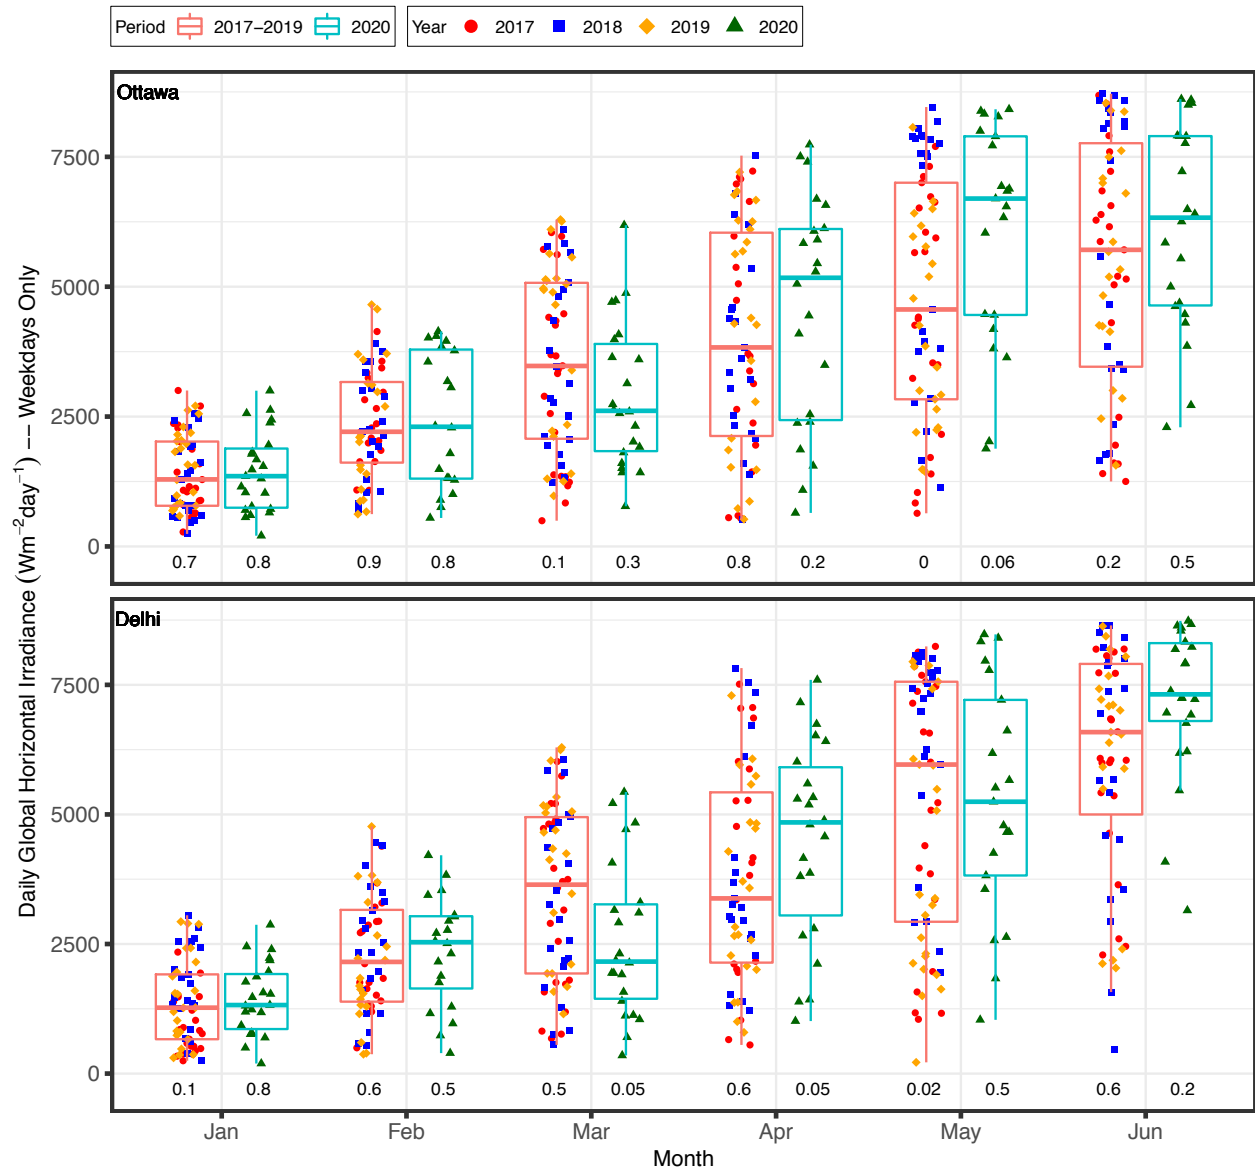

...Figure 3(b) next page/

(b)

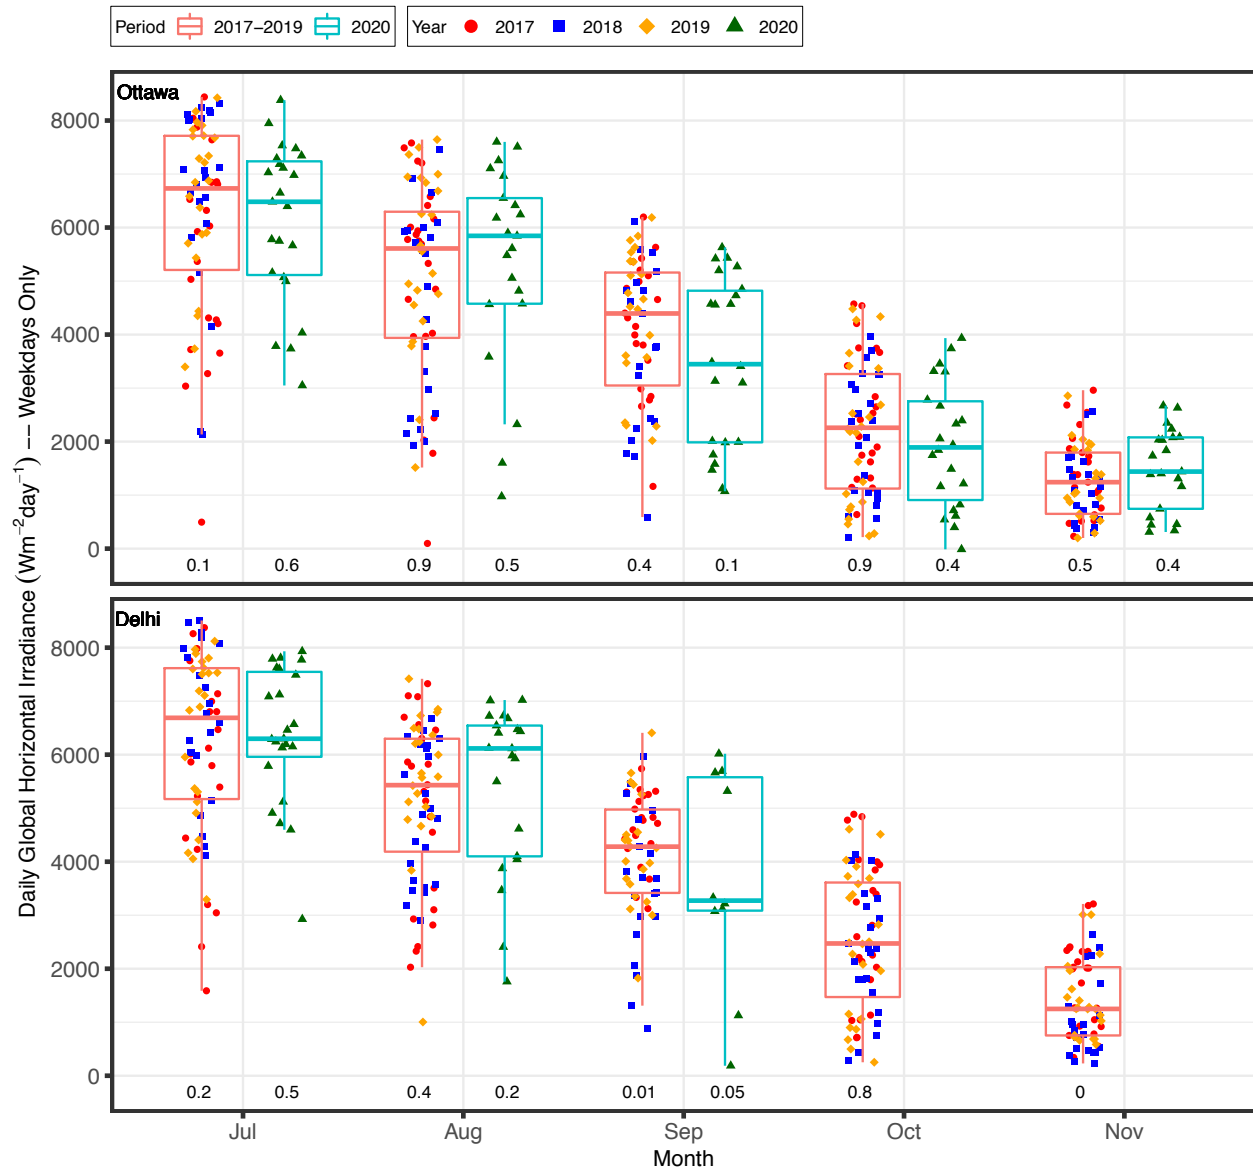

**Figure S3.** Daily (i.e., sum of hourly) solar global horizontal irradiance (GHI) in Ottawa, ON (top) and Delhi, ON (bottom) per month, as a function of year, (a) Jan-Jun, and (b) July-Nov. Values of GHI were converted from the measured radiation field 1(RF1). RF1 is a legacy term used by ECCC for solar radiation observations. It generally refers to the global solar radiation on a horizontal surface for an hour in energy units ( $\text{MJ m}^{-2}$ ). Number below each data box corresponds to the calculated p-value. See text for details. The sensor at the Delhi station went down in October and November, hence no data available for these two months.



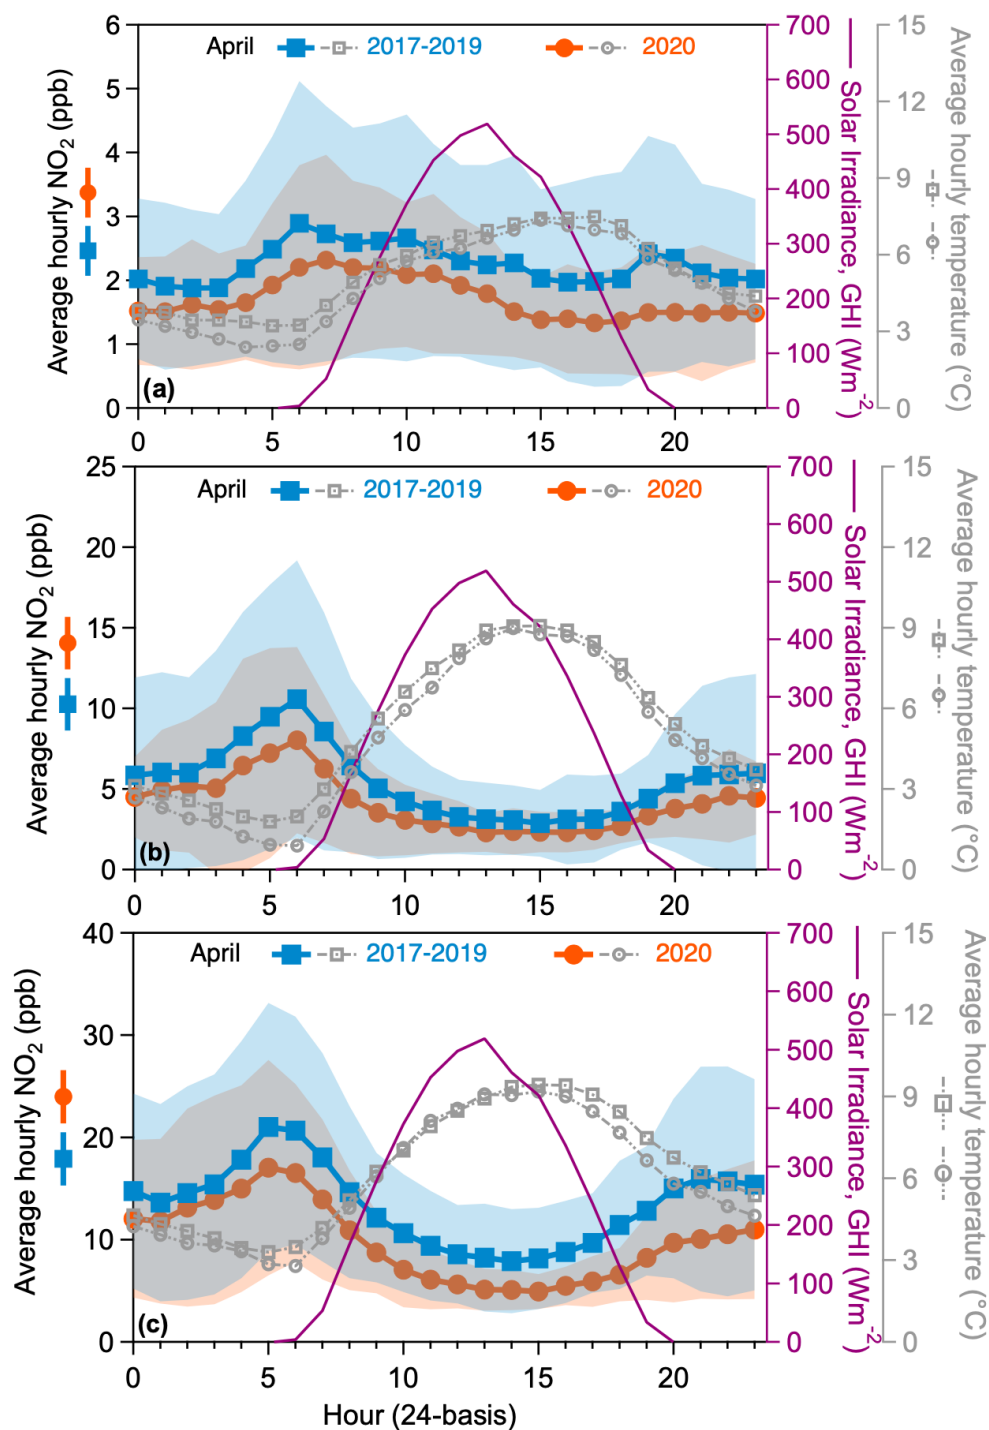

**Figure S4.** Diurnal levels of NO<sub>2</sub> (left axis) in April over 2017-2019 and 2020 for selected AQ stations in Southern Ontario: (a) Grand bend (rural), (b) Kitchener (urban), and (c) Toronto West (urban). The right axes show the average hourly solar irradiance, GHI, in April 2017-2019 at Delhi, ON, which is the closest irradiance observation station to the three locations, and average hourly temperature for each location in April 2017-2019 and 2020. The shaded areas represent the standard deviation,  $\pm 1 \sigma$ .

(A)

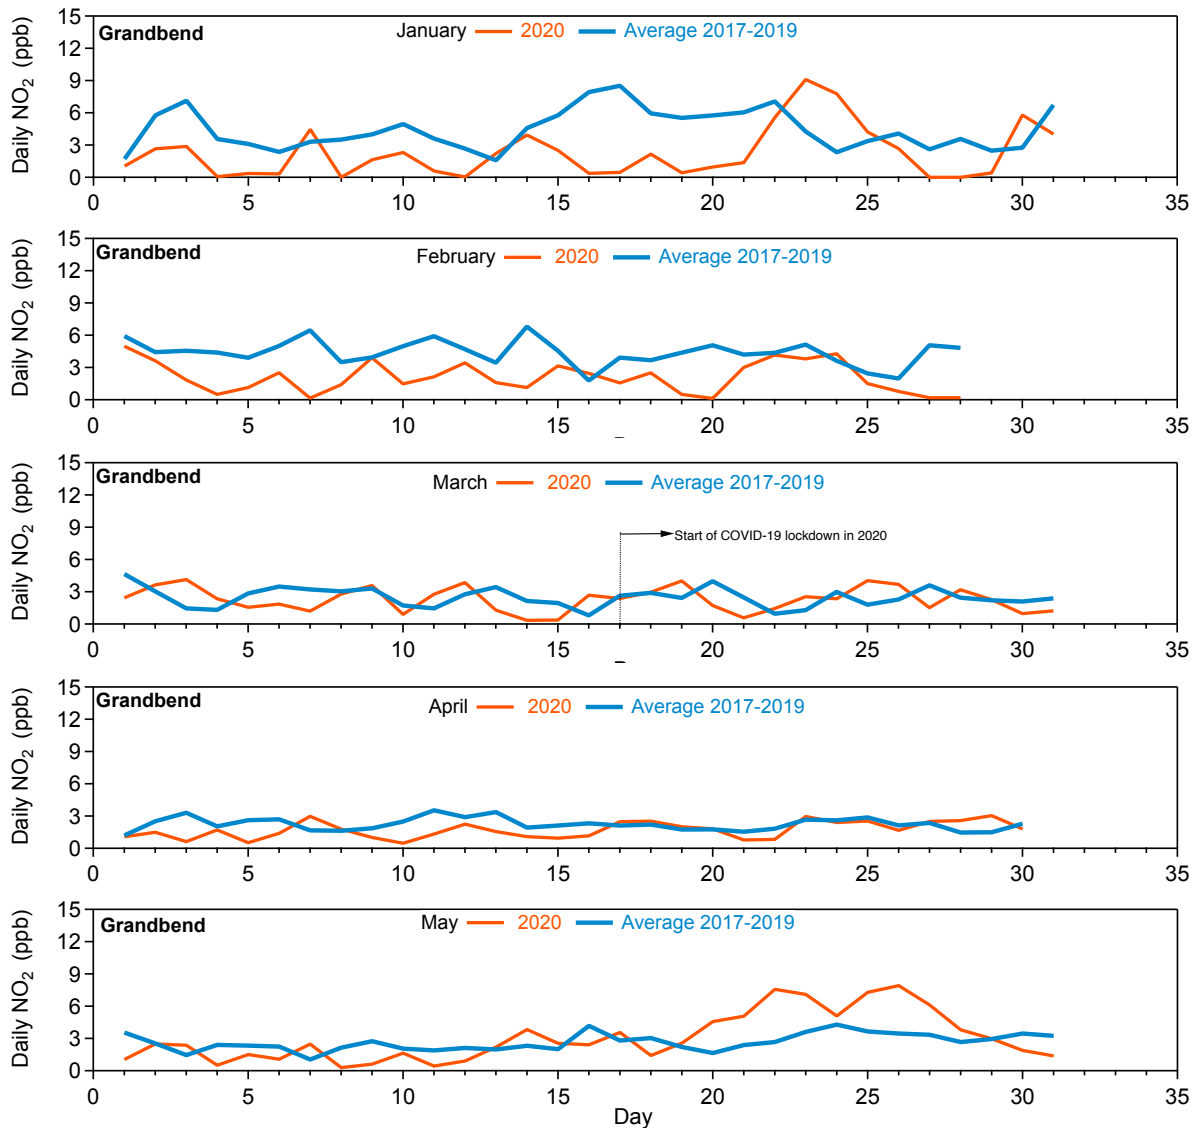

(B)

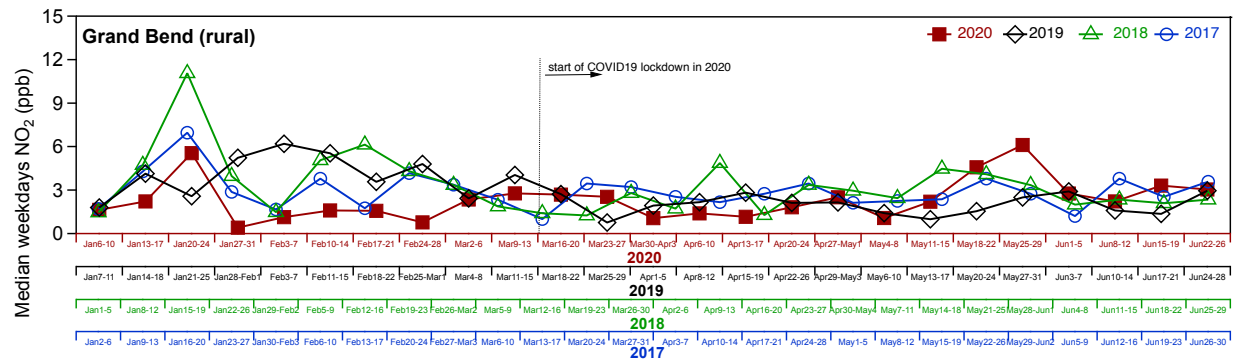

**Figure S5.** (A) Daily NO<sub>2</sub> levels in Jan-May from the average data over 2017-2019 and for 2020. (B) Median of weekdays of NO<sub>2</sub> levels from January to June per year over 2017-2020.

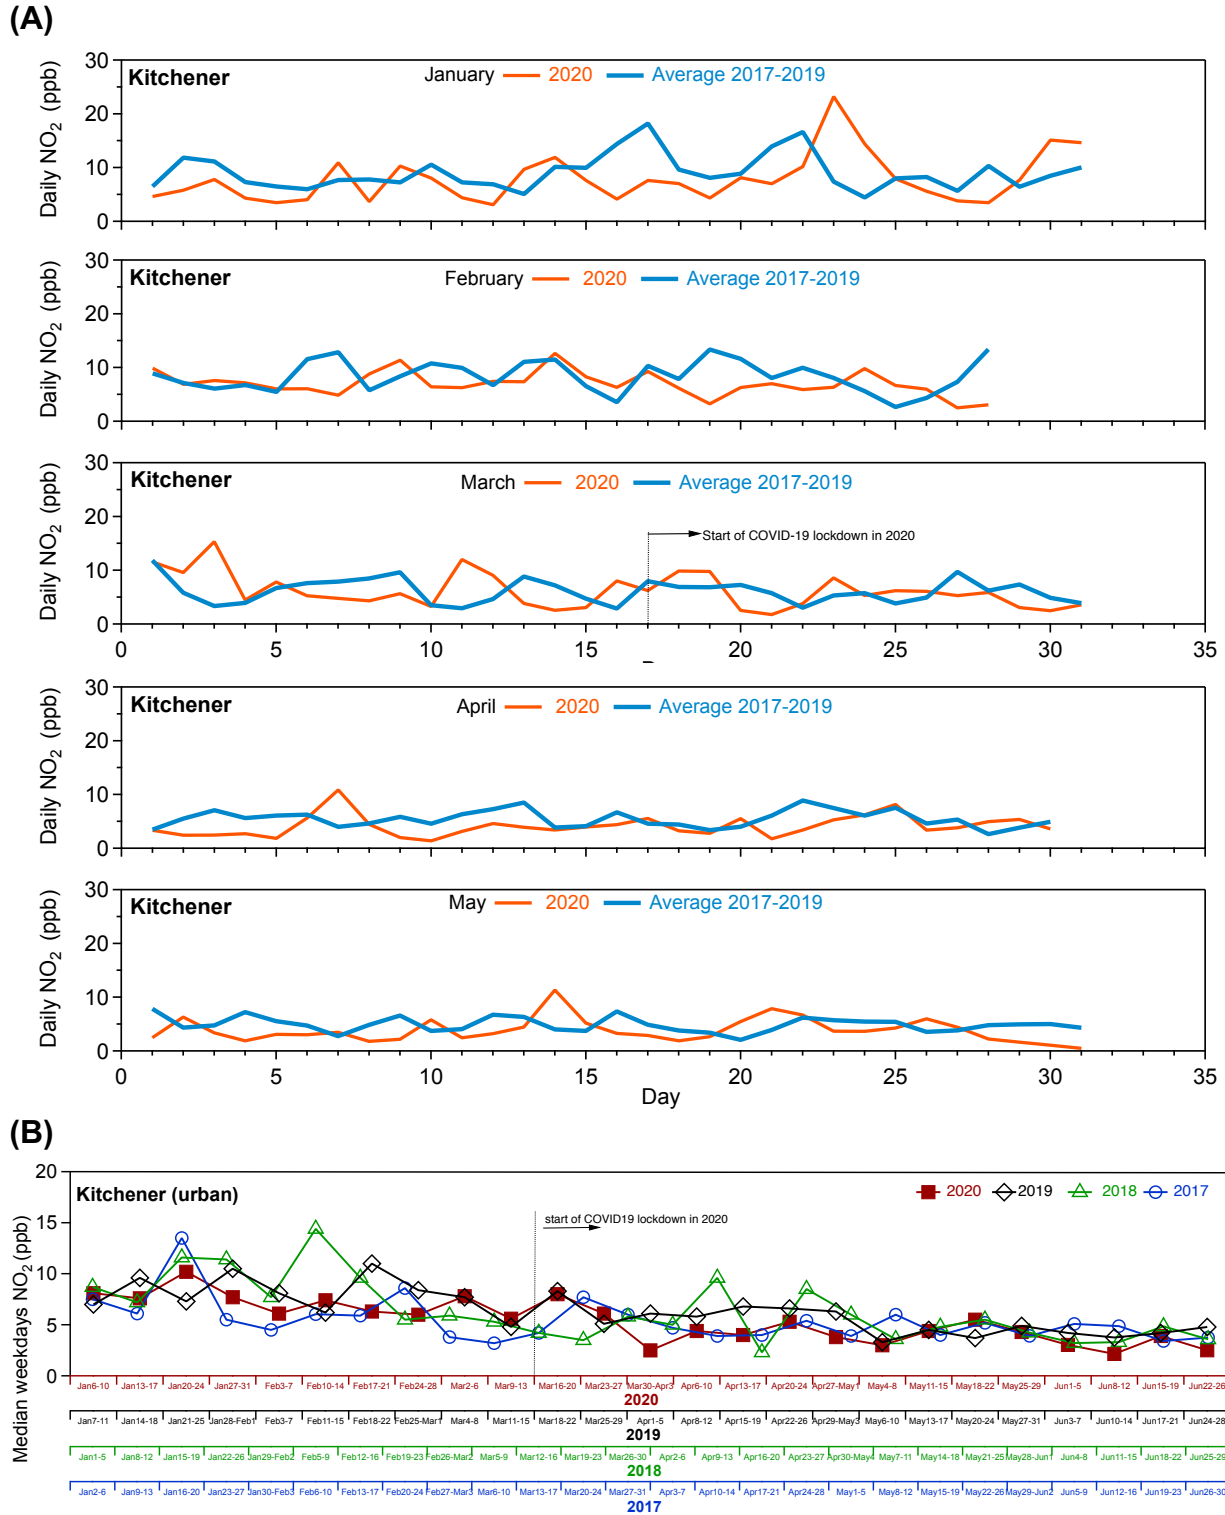

**Figure S6.** (A) Daily NO<sub>2</sub> levels in Jan-May from the average data over 2017-2019 and for 2020. (B) Median of weekdays of NO<sub>2</sub> levels from January to June per year over 2017-2020.

(A)

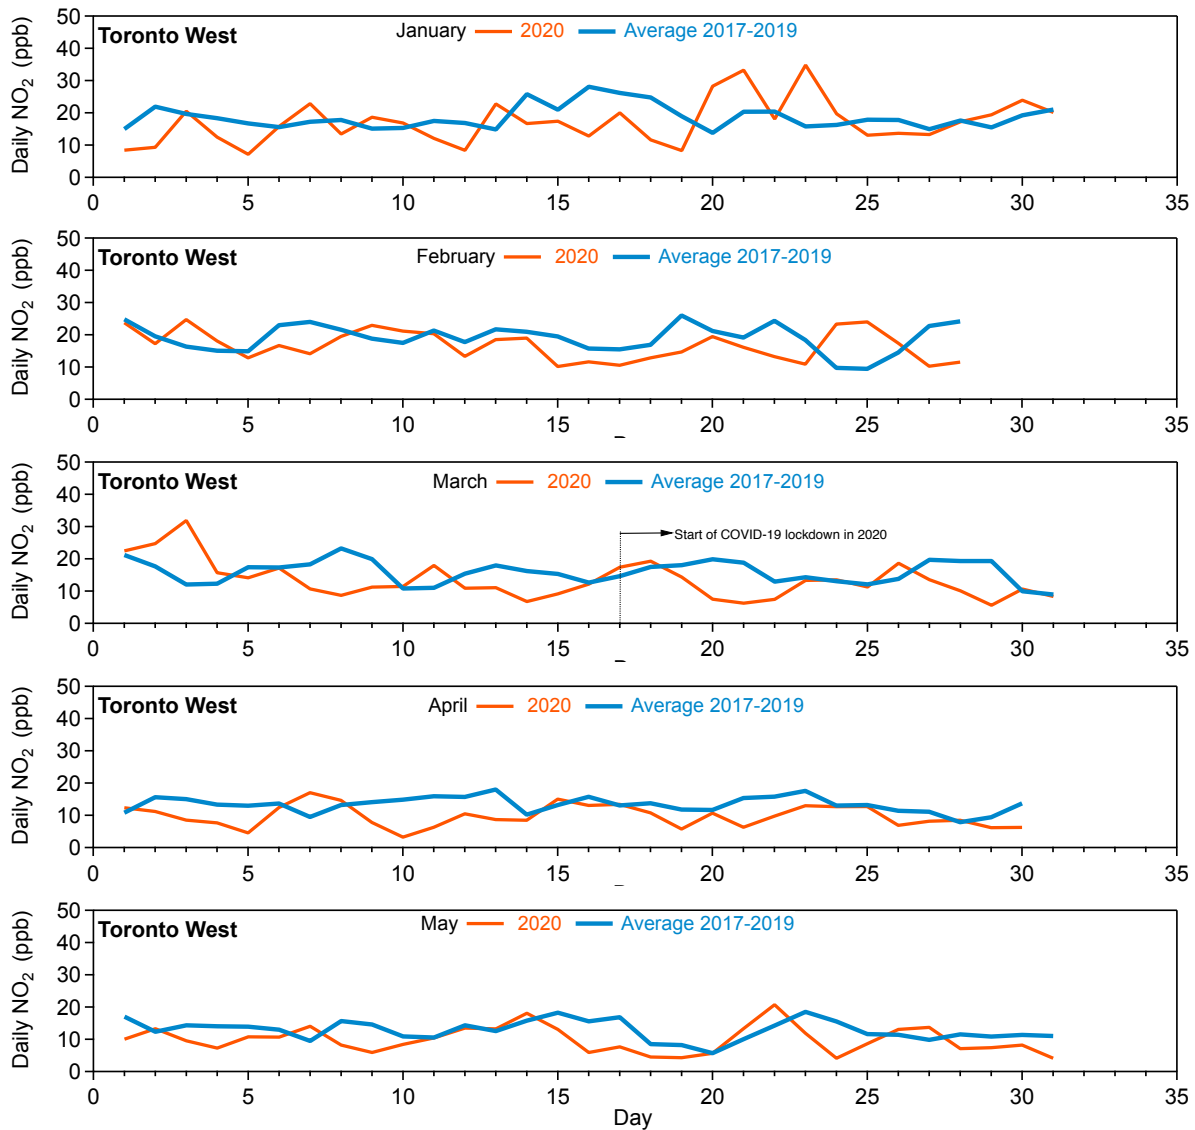

(B)

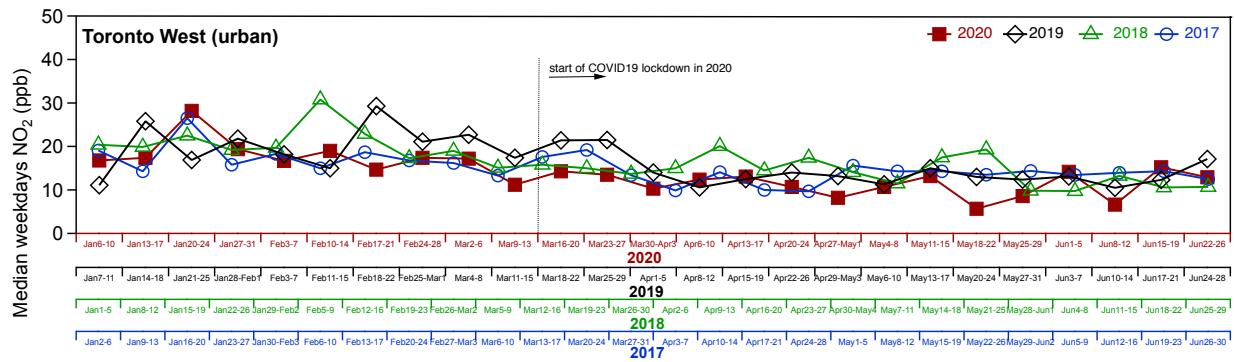

**Figure S7. (A)** Daily NO<sub>2</sub> levels in Jan-May from the average data over 2017-2019 and for 2020. **(B)** Median of weekdays of NO<sub>2</sub> levels from January to June per year over 2017-2020.

**Table S2.** Summary of p-values calculated from monthly median values of pollutant concentrations over 2017-2019 and 2020.

| AQ station name <sup>a</sup><br>R = Rural<br>U = Urban | Pollutant                                    |             |             |             |             |             |                 |             |     |             |             |     |                      |          |             |          |      |             |                                         |      |             |             |             |             |
|--------------------------------------------------------|----------------------------------------------|-------------|-------------|-------------|-------------|-------------|-----------------|-------------|-----|-------------|-------------|-----|----------------------|----------|-------------|----------|------|-------------|-----------------------------------------|------|-------------|-------------|-------------|-------------|
|                                                        | NO <sub>2</sub> (ppb)                        |             |             |             |             |             | CO (ppm)        |             |     |             |             |     | O <sub>3</sub> (ppb) |          |             |          |      |             | PM <sub>2.5</sub> (µg m <sup>-3</sup> ) |      |             |             |             |             |
|                                                        | p-values calculated from median <sup>b</sup> |             |             |             |             |             |                 |             |     |             |             |     |                      |          |             |          |      |             |                                         |      |             |             |             |             |
|                                                        | Apr                                          |             | May         |             | Jun         |             | Apr             |             | May |             | Jun         |     | Apr                  |          | May         |          | Jun  |             | Apr                                     |      | May         |             | Jun         |             |
| 17                                                     | 20                                           | 17          | 20          | 17          | 20          | 17          | 20              | 17          | 20  | 17          | 20          | 17  | 20                   | 17       | 20          | 17       | 20   | 17          | 20                                      | 17   | 20          | 17          | 20          |             |
| -                                                      | -                                            | -           | -           | -           | -           | -           | -               | -           | -   | -           | -           | -   | -                    | -        | -           | -        | -    | -           | -                                       | -    | -           | -           | -           |             |
| 19                                                     | 19                                           | 19          | 19          | 19          | 19          | 19          | 19              | 19          | 19  | 19          | 19          | 19  | 19                   | 19       | 19          | 19       | 19   | 19          | 19                                      | 19   | 19          | 19          | 19          |             |
| Grand Bend (R)                                         | 0.5                                          | <b>0.02</b> | <u>0</u>    | 0.8         | 0.2         | 0.2         | No measurements |             |     |             |             |     | <u>0</u>             | 0.8      | 0.4         | 0.9      | 0.9  | 0.2         | 0.1                                     | 0.6  | <u>0</u>    | 0.7         | <u>0.01</u> | 0.2         |
| Guelph (U)                                             | <u>0.02</u>                                  | <b>0.04</b> | 0.2         | 0.1         | 1           | 0.8         | No measurements |             |     |             |             |     | 0.07                 | 0.5      | 0           | 0.8      | 0.06 | <b>0.05</b> | 0.9                                     | 0.8  | <u>0</u>    | 0.2         | 0.2         | <b>0.02</b> |
| Hamilton Downtown (U)                                  | 0.8                                          | 0.08        | 0.1         | 0.6         | 0.2         | 0.2         | 0.5             | <b>0.01</b> | 0.5 | 0.7         | 0.1         | 0.4 | 0.1                  | 0.2      | <b>0.04</b> | 0.5      | 1    | <b>0.02</b> | 0.8                                     | 0.7  | 0.1         | 0.3         | 0.1         | 0.7         |
| Hamilton Mountain (U)                                  | 0.8                                          | 0.1         | 0.5         | 0.9         | 0.5         | 0.1         | No measurements |             |     |             |             |     | 0.2                  | 0.1      | <u>0.01</u> | 0.7      | 0.6  | <b>0.03</b> | 0.6                                     | 0.2  | <u>0.01</u> | 0.4         | <u>0.04</u> | 0.3         |
| Hamilton West (U)                                      | 0.3                                          | 0.2         | 0.5         | 0.1         | <u>0.01</u> | 0.3         | No measurements |             |     |             |             |     | 0.1                  | 0.5      | 0.03        | 0.9      | 0.7  | <b>0.01</b> | 0.7                                     | 0.4  | <u>0</u>    | <b>0.03</b> | 0.06        | 0.3         |
| Kitchener (U)                                          | <u>0.04</u>                                  | 0.08        | 1           | <b>0.04</b> | 1           | 0.13        | No measurements |             |     |             |             |     | 0.5                  | 0.5      | <u>0.01</u> | 0.8      | 0.2  | 0.06        | 0.8                                     | 0.6  | <u>0</u>    | 0.4         | 0.4         | 0.4         |
| London (U)                                             | <u>0.03</u>                                  | <b>0.01</b> | 0.2         | <b>0.02</b> | 0.4         | <b>0.02</b> | No measurements |             |     |             |             |     | 0.1                  | 0.6      | <u>0.01</u> | 0.4      | 0.7  | 0.5         | 0.9                                     | 0.01 | <u>0</u>    | 0.1         | 0.1         | 0.1         |
| Ottawa Downtown (U)                                    | 0.07                                         | 0.2         | 0.05        | 0.2         | 0.6         | 0.1         | 0.1             | 0           | 0   | <b>0.01</b> | <u>0.04</u> | 0.3 | 0.09                 | 0.6      | <u>0.02</u> | 0.4      | 0.8  | <b>0.02</b> | 0.5                                     | 0.3  | <u>0</u>    | <b>0.03</b> | 0.2         | 0.05        |
| Parry Sound (U)                                        | 0.3                                          | 0.6         | 0.1         | 0.6         | 0.9         | 0.4         | No measurements |             |     |             |             |     | <u>0</u>             | 0.4      | 0           | 0.2      | 0.8  | 0.3         | <b>0.04</b>                             | 0.3  | 0           | 0.5         | 0.09        | 0           |
| Sarnia (U)                                             | 0.1                                          | <b>0.02</b> | <u>0.01</u> | 0.1         | 0.07        | 0.6         | No measurements |             |     |             |             |     | <u>0.01</u>          | <u>0</u> | 0.2         | <u>0</u> | 0.7  | 0.9         | 0.4                                     | 0.9  | 0.1         | 0.7         | 0.9         | 0.2         |
| Toronto Downtown (U)                                   | <u>0.01</u>                                  | 0.2         | <u>0.01</u> | <b>0.01</b> | 0.05        | 0.2         | No measurements |             |     |             |             |     | 0.1                  | 0.3      | 0.01        | 0        | 0.5  | 0.5         | 0.5                                     | 0.4  | <u>0</u>    | 0.5         | <u>0.03</u> | <b>0.03</b> |

|                      |             |             |     |             |          |     |                 |             |             |             |      |      |             |             |          |             |          |             |             |      |     |             |      |     |
|----------------------|-------------|-------------|-----|-------------|----------|-----|-----------------|-------------|-------------|-------------|------|------|-------------|-------------|----------|-------------|----------|-------------|-------------|------|-----|-------------|------|-----|
| Toronto East (U)     | <u>0.01</u> | <u>0.01</u> | 0.2 | 0.1         | <u>0</u> | 0.2 | No measurements |             |             |             |      | 0.9  | <u>0.02</u> | <u>0.04</u> | 0.7      | 0.2         | <u>0</u> | 0.9         | 0.5         | 0.01 | 0.1 | 0.2         | 0.06 |     |
| Toronto North (U)    | 0.01        | <u>0.04</u> | 0.1 | 0.6         | 0.3      | 0.9 | No measurements |             |             |             |      | 0.9  | <u>0.01</u> | 0           | 0.9      | <u>0.01</u> | <u>0</u> | 0.9         | 0.9         | 0.01 | 0.2 | 0.4         | 0.8  |     |
| Toronto West (U)     | 0           | <u>0.02</u> | 0.3 | 0.06        | 0.1      | 0.2 | 0.3             | <u>0</u>    | 0.3         | 0.1         | 0.01 | 0.8  | 1           | <u>0.01</u> | 0        | 0.9         | 0.5      | <u>0.03</u> | 0.9         | 0.8  | 0   | 0.2         | 0.4  | 0.9 |
| Windsor Downtown (U) | <u>0</u>    | 0.1         | 0.1 | <u>0.01</u> | 0.2      | 0.1 | <u>0.01</u>     | <u>0.03</u> | <u>0.01</u> | <u>0.01</u> | 0.5  | 0.1  | 0.1         | 0.3         | <u>0</u> | 0.6         | 0.7      | 0.3         | 0.2         | 0.4  | 0.3 | <u>0.04</u> | 0.6  | 1   |
| Windsor West (U)     | 0.4         | 0.5         | 0.3 | <u>0</u>    | 0.06     | 0.2 | No measurements |             |             |             |      | 0.08 | 0           | 0           | 0.2      | 0.7         | 0.2      | 0.3         | <u>0.03</u> | 0.2  | 0.9 | 0.9         | 0.08 |     |

**Notes.** Values equal or below 0.05 (5%) are considered statistically significant (underlined) when comparing 2020 median pollutant data to those from the 2017-2019 data. In other words, if a p-value in the year “17-19” column is greater than 0.05, then that means that these years can be considered similar to each other (i.e., no statistically significant difference among years). If a p-value in the year “20” column is greater than 0.05, that means pollutant data in 2020 are similar to those collected for 2017-2019 (i.e., no statistically significant difference between 2020 and the previous three years). <sup>a</sup> See Table S1 for station type and Figure 1 for location. <sup>b</sup> See Methods section for details. See Figures S8-S10 for the association of p-values with weekdays median of pollutant concentrations.

**Table S3. Grand Bend (rural)**

| <b>Median O<sub>3</sub> (ppb)</b> |             |             |             |                 |             |             |             |                  |             |             |             |
|-----------------------------------|-------------|-------------|-------------|-----------------|-------------|-------------|-------------|------------------|-------------|-------------|-------------|
| <b>April</b>                      |             |             |             | <b>May</b>      |             |             |             | <b>June</b>      |             |             |             |
| <b>2017</b>                       | <b>2018</b> | <b>2019</b> | <b>2020</b> | <b>2017</b>     | <b>2018</b> | <b>2019</b> | <b>2020</b> | <b>2017</b>      | <b>2018</b> | <b>2019</b> | <b>2020</b> |
| 34.3                              | 40.3        | 37.1        | 37.0        | 35.8            | 37.0        | 33.9        | 35.8        | 34.0             | 33.7        | 35.0        | 37.7        |
| <b>July</b>                       |             |             |             | <b>August</b>   |             |             |             | <b>September</b> |             |             |             |
| <b>17</b>                         | <b>18</b>   | <b>19</b>   | <b>20</b>   | <b>17</b>       | <b>18</b>   | <b>19</b>   | <b>20</b>   | <b>17</b>        | <b>18</b>   | <b>19</b>   | <b>20</b>   |
| 31.1                              | 34.5        | 31.5        | 29.8        | 30.8            | 32.4        | 29.3        | 24.6        | 26.6             | 22.7        | 26.9        | 26.5        |
| <b>October</b>                    |             |             |             | <b>November</b> |             |             |             | <b>December</b>  |             |             |             |
| <b>17</b>                         | <b>18</b>   | <b>19</b>   | <b>20</b>   | <b>17</b>       | <b>18</b>   | <b>19</b>   | <b>20</b>   | <b>17</b>        | <b>18</b>   | <b>19</b>   | <b>20</b>   |
| 26.8                              | 24.8        | 25.0        | 24.5        | 25.2            | 23.9        | 27.4        | 27.9        | 30.0             | 25.3        | 26.5        | 25.4        |

| <b>Median PM<sub>2.5</sub> (µg m<sup>-3</sup>)</b> |           |           |           |                 |           |           |           |                  |           |           |           |
|----------------------------------------------------|-----------|-----------|-----------|-----------------|-----------|-----------|-----------|------------------|-----------|-----------|-----------|
| <b>April</b>                                       |           |           |           | <b>May</b>      |           |           |           | <b>June</b>      |           |           |           |
| <b>17</b>                                          | <b>18</b> | <b>19</b> | <b>20</b> | <b>17</b>       | <b>18</b> | <b>19</b> | <b>20</b> | <b>17</b>        | <b>18</b> | <b>19</b> | <b>20</b> |
| 3.4                                                | 4.9       | 3.7       | 4.2       | 2.8             | 5.9       | 3.8       | 3.8       | 1.7              | 3.2       | 4.2       | 4.4       |
| <b>July</b>                                        |           |           |           | <b>August</b>   |           |           |           | <b>September</b> |           |           |           |
| <b>17</b>                                          | <b>18</b> | <b>19</b> | <b>20</b> | <b>17</b>       | <b>18</b> | <b>19</b> | <b>20</b> | <b>17</b>        | <b>18</b> | <b>19</b> | <b>20</b> |
| 4.4                                                | 5.4       | 5.8       | 4.3       | 5.8             | 5.5       | 3.1       | 3.0       | 5.3              | 3.0       | 3.8       | 2.9       |
| <b>October</b>                                     |           |           |           | <b>November</b> |           |           |           | <b>December</b>  |           |           |           |
| <b>17</b>                                          | <b>18</b> | <b>19</b> | <b>20</b> | <b>17</b>       | <b>18</b> | <b>19</b> | <b>20</b> | <b>17</b>        | <b>18</b> | <b>19</b> | <b>20</b> |
| 3.4                                                | 3.8       | 3.3       | 3.0       | 4.8             | 4.8       | 3.9       | 4.5       | 3.8              | 6.1       | 6.8       | 5.0       |

| <b>Median NO<sub>2</sub> (ppb)</b> |           |           |           |                 |           |           |           |                  |           |           |           |
|------------------------------------|-----------|-----------|-----------|-----------------|-----------|-----------|-----------|------------------|-----------|-----------|-----------|
| <b>April</b>                       |           |           |           | <b>May</b>      |           |           |           | <b>June</b>      |           |           |           |
| <b>17</b>                          | <b>18</b> | <b>19</b> | <b>20</b> | <b>17</b>       | <b>18</b> | <b>19</b> | <b>20</b> | <b>17</b>        | <b>18</b> | <b>19</b> | <b>20</b> |
| 2.7                                | 2.1       | 2.2       | 1.5       | 2.8             | 4.0       | 1.6       | 2.6       | 2.6              | 2.3       | 1.7       | 2.8       |
| <b>July</b>                        |           |           |           | <b>August</b>   |           |           |           | <b>September</b> |           |           |           |
| <b>17</b>                          | <b>18</b> | <b>19</b> | <b>20</b> | <b>17</b>       | <b>18</b> | <b>19</b> | <b>20</b> | <b>17</b>        | <b>18</b> | <b>19</b> | <b>20</b> |
| 2.7                                | 3.0       | 2.3       | 2.4       | 2.6             | 2.7       | 1.4       | 1.7       | 2.6              | 2.1       | 1.7       | 1.6       |
| <b>October</b>                     |           |           |           | <b>November</b> |           |           |           | <b>December</b>  |           |           |           |
| <b>17</b>                          | <b>18</b> | <b>19</b> | <b>20</b> | <b>17</b>       | <b>18</b> | <b>19</b> | <b>20</b> | <b>17</b>        | <b>18</b> | <b>19</b> | <b>20</b> |
| 3.0                                | 2.4       | 1.8       | 1.7       | 4.2             | 2.8       | 3.1       | 2.9       | 3.1              | 4.2       | 2.4       | 3.0       |

**Table S4. Guelph (urban)**

| <b>Median O<sub>3</sub> (ppb)</b> |             |             |             |                 |             |             |             |                  |             |             |             |
|-----------------------------------|-------------|-------------|-------------|-----------------|-------------|-------------|-------------|------------------|-------------|-------------|-------------|
| <b>April</b>                      |             |             |             | <b>May</b>      |             |             |             | <b>June</b>      |             |             |             |
| <b>2017</b>                       | <b>2018</b> | <b>2019</b> | <b>2020</b> | <b>2017</b>     | <b>2018</b> | <b>2019</b> | <b>2020</b> | <b>2017</b>      | <b>2018</b> | <b>2019</b> | <b>2020</b> |
| 34.4                              | 36.3        | 32.4        | 35.0        | 34.1            | 36.8        | 28.5        | 33.0        | 30.4             | 33.9        | 29.1        | 35.1        |
| <b>July</b>                       |             |             |             | <b>August</b>   |             |             |             | <b>September</b> |             |             |             |
| <b>17</b>                         | <b>18</b>   | <b>19</b>   | <b>20</b>   | <b>17</b>       | <b>18</b>   | <b>19</b>   | <b>20</b>   | <b>17</b>        | <b>18</b>   | <b>19</b>   | <b>20</b>   |
| 28.6                              | 32.5        | 28.6        | 26.0        | 28.8            | 27.3        | 27.0        | 23.8        | 23.1             | 20.9        | 22.0        | 22.6        |
| <b>October</b>                    |             |             |             | <b>November</b> |             |             |             | <b>December</b>  |             |             |             |
| <b>17</b>                         | <b>18</b>   | <b>19</b>   | <b>20</b>   | <b>17</b>       | <b>18</b>   | <b>19</b>   | <b>20</b>   | <b>17</b>        | <b>18</b>   | <b>19</b>   | <b>20</b>   |
| 23.6                              | 20.3        | 17.5        | 21.3        | 20.9            | 20.3        | 22.5        | 24.7        | 26.2             | 19.5        | 20.5        | 23.9        |

| <b>Median PM<sub>2.5</sub> (µg m<sup>-3</sup>)</b> |           |           |           |                 |           |           |           |                  |           |           |           |
|----------------------------------------------------|-----------|-----------|-----------|-----------------|-----------|-----------|-----------|------------------|-----------|-----------|-----------|
| <b>April</b>                                       |           |           |           | <b>May</b>      |           |           |           | <b>June</b>      |           |           |           |
| <b>17</b>                                          | <b>18</b> | <b>19</b> | <b>20</b> | <b>17</b>       | <b>18</b> | <b>19</b> | <b>20</b> | <b>17</b>        | <b>18</b> | <b>19</b> | <b>20</b> |
| 4.5                                                | 5.7       | 5.7       | 5.8       | 4.8             | 8.7       | 6.1       | 4.8       | 4.1              | 5.9       | 6.4       | 8.1       |
| <b>July</b>                                        |           |           |           | <b>August</b>   |           |           |           | <b>September</b> |           |           |           |
| <b>17</b>                                          | <b>18</b> | <b>19</b> | <b>20</b> | <b>17</b>       | <b>18</b> | <b>19</b> | <b>20</b> | <b>17</b>        | <b>18</b> | <b>19</b> | <b>20</b> |
| 7.0                                                | 6.8       | 8.6       | 6.1       | 7.9             | 7.4       | 4.7       | 5.0       | 7.4              | 5.0       | 5.6       | 6.2       |
| <b>October</b>                                     |           |           |           | <b>November</b> |           |           |           | <b>December</b>  |           |           |           |
| <b>17</b>                                          | <b>18</b> | <b>19</b> | <b>20</b> | <b>17</b>       | <b>18</b> | <b>19</b> | <b>20</b> | <b>17</b>        | <b>18</b> | <b>19</b> | <b>20</b> |
| 5.5                                                | 4.1       | 5.7       | 5.5       | 7.0             | 4.0       | 4.7       | 7.8       | 5.4              | 8.8       | 6.4       | 6.8       |

| <b>Median NO<sub>2</sub> (ppb)</b> |           |           |           |                 |           |           |           |                  |           |           |           |
|------------------------------------|-----------|-----------|-----------|-----------------|-----------|-----------|-----------|------------------|-----------|-----------|-----------|
| <b>April</b>                       |           |           |           | <b>May</b>      |           |           |           | <b>June</b>      |           |           |           |
| <b>17</b>                          | <b>18</b> | <b>19</b> | <b>20</b> | <b>17</b>       | <b>18</b> | <b>19</b> | <b>20</b> | <b>17</b>        | <b>18</b> | <b>19</b> | <b>20</b> |
| 4.5                                | 7.0       | 4.8       | 3.8       | 4.3             | 5.0       | 3.8       | 3.4       | 3.5              | 3.5       | 3.7       | 3.8       |
| <b>July</b>                        |           |           |           | <b>August</b>   |           |           |           | <b>September</b> |           |           |           |
| <b>17</b>                          | <b>18</b> | <b>19</b> | <b>20</b> | <b>17</b>       | <b>18</b> | <b>19</b> | <b>20</b> | <b>17</b>        | <b>18</b> | <b>19</b> | <b>20</b> |
| 3.1                                | 4.3       |           |           | 4.5             | 3.5       |           |           | 6.4              | 4.3       |           |           |
| <b>October</b>                     |           |           |           | <b>November</b> |           |           |           | <b>December</b>  |           |           |           |
| <b>17</b>                          | <b>18</b> | <b>19</b> | <b>20</b> | <b>17</b>       | <b>18</b> | <b>19</b> | <b>20</b> | <b>17</b>        | <b>18</b> | <b>19</b> | <b>20</b> |
| 6.3                                | 4.7       |           |           | 8.3             | 7.0       |           |           | 6.9              | 6.4       |           |           |



**Table S5. Hamilton Downtown (U)**

| <b>Median O<sub>3</sub> (ppb)</b> |             |             |             |                 |             |             |             |                  |             |             |             |
|-----------------------------------|-------------|-------------|-------------|-----------------|-------------|-------------|-------------|------------------|-------------|-------------|-------------|
| <b>April</b>                      |             |             |             | <b>May</b>      |             |             |             | <b>June</b>      |             |             |             |
| <b>2017</b>                       | <b>2018</b> | <b>2019</b> | <b>2020</b> | <b>2017</b>     | <b>2018</b> | <b>2019</b> | <b>2020</b> | <b>2017</b>      | <b>2018</b> | <b>2019</b> | <b>2020</b> |
| 29.4                              | 33.1        | 28.2        | 32.7        | 29.7            | 32.8        | 25.6        | 29.1        | 28.0             | 27.5        | 27.4        | 34.2        |
| <b>July</b>                       |             |             |             | <b>August</b>   |             |             |             | <b>September</b> |             |             |             |
| <b>17</b>                         | <b>18</b>   | <b>19</b>   | <b>20</b>   | <b>17</b>       | <b>18</b>   | <b>19</b>   | <b>20</b>   | <b>17</b>        | <b>18</b>   | <b>19</b>   | <b>20</b>   |
| 27.0                              | 31.8        | 28.4        | 29.3        | 27.5            | 31.3        | 25.0        | 23.5        | 19.9             | 19.6        | 22.1        | 24.3        |
| <b>October</b>                    |             |             |             | <b>November</b> |             |             |             | <b>December</b>  |             |             |             |
| <b>17</b>                         | <b>18</b>   | <b>19</b>   | <b>20</b>   | <b>17</b>       | <b>18</b>   | <b>19</b>   | <b>20</b>   | <b>17</b>        | <b>18</b>   | <b>19</b>   | <b>20</b>   |
| 21.5                              | 18.1        | 15.9        | 19.3        | 20.2            | 15.1        | 18.4        | 23.5        | 19.4             | 15.4        | 17.9        | 20.4        |

| <b>Median PM<sub>2.5</sub> (µg m<sup>-3</sup>)</b> |           |           |           |                 |           |           |           |                  |           |           |           |
|----------------------------------------------------|-----------|-----------|-----------|-----------------|-----------|-----------|-----------|------------------|-----------|-----------|-----------|
| <b>April</b>                                       |           |           |           | <b>May</b>      |           |           |           | <b>June</b>      |           |           |           |
| <b>17</b>                                          | <b>18</b> | <b>19</b> | <b>20</b> | <b>17</b>       | <b>18</b> | <b>19</b> | <b>20</b> | <b>17</b>        | <b>18</b> | <b>19</b> | <b>20</b> |
| 7.2                                                | 8.7       | 7.7       | 6.9       | 8.5             | 11.3      | 9.7       | 8.5       | 6.5              | 9.2       | 10.9      | 9.5       |
| <b>July</b>                                        |           |           |           | <b>August</b>   |           |           |           | <b>September</b> |           |           |           |
| <b>17</b>                                          | <b>18</b> | <b>19</b> | <b>20</b> | <b>17</b>       | <b>18</b> | <b>19</b> | <b>20</b> | <b>17</b>        | <b>18</b> | <b>19</b> | <b>20</b> |
| 9.4                                                | 9.9       | 10.8      | 8.5       | 10.4            | 9.8       | 6.8       | 7.6       | 12.0             | 6.4       | 6.4       | 6.4       |
| <b>October</b>                                     |           |           |           | <b>November</b> |           |           |           | <b>December</b>  |           |           |           |
| <b>17</b>                                          | <b>18</b> | <b>19</b> | <b>20</b> | <b>17</b>       | <b>18</b> | <b>19</b> | <b>20</b> | <b>17</b>        | <b>18</b> | <b>19</b> | <b>20</b> |
| 6.9                                                | 5.5       | 6.3       | 4.4       | 8.1             | 8.0       | 7.4       | 8.4       | 6.1              | 9.6       | 7.1       | 7.5       |

| <b>Median NO<sub>2</sub> (ppb)</b> |           |           |           |                 |           |           |           |                  |           |           |           |
|------------------------------------|-----------|-----------|-----------|-----------------|-----------|-----------|-----------|------------------|-----------|-----------|-----------|
| <b>April</b>                       |           |           |           | <b>May</b>      |           |           |           | <b>June</b>      |           |           |           |
| <b>17</b>                          | <b>18</b> | <b>19</b> | <b>20</b> | <b>17</b>       | <b>18</b> | <b>19</b> | <b>20</b> | <b>17</b>        | <b>18</b> | <b>19</b> | <b>20</b> |
| 12.9                               | 11.7      | 12.4      | 9.0       | 10.5            | 16.0      | 15.2      | 11.0      | 8.1              | 11.5      | 12.8      | 6.7       |
| <b>July</b>                        |           |           |           | <b>August</b>   |           |           |           | <b>September</b> |           |           |           |
| <b>17</b>                          | <b>18</b> | <b>19</b> | <b>20</b> | <b>17</b>       | <b>18</b> | <b>19</b> | <b>20</b> | <b>17</b>        | <b>18</b> | <b>19</b> | <b>20</b> |
| 9.6                                | 9.5       | 9.3       | 7.0       | 9.0             | 5.7       | 7.0       | 7.5       | 12.4             | 8.8       | 9.3       | 5.8       |
| <b>October</b>                     |           |           |           | <b>November</b> |           |           |           | <b>December</b>  |           |           |           |
| <b>17</b>                          | <b>18</b> | <b>19</b> | <b>20</b> | <b>17</b>       | <b>18</b> | <b>19</b> | <b>20</b> | <b>17</b>        | <b>18</b> | <b>19</b> | <b>20</b> |
| 10.9                               | 10.1      | 12.1      | 8.9       | 11.7            | 13.5      | 12.4      | 11.1      | 14.2             | 13.3      | 15.2      | 11.3      |

| <b>Median CO (ppm)</b> |           |           |           |                 |           |           |           |                  |           |           |           |
|------------------------|-----------|-----------|-----------|-----------------|-----------|-----------|-----------|------------------|-----------|-----------|-----------|
| <b>April</b>           |           |           |           | <b>May</b>      |           |           |           | <b>June</b>      |           |           |           |
| <b>17</b>              | <b>18</b> | <b>19</b> | <b>20</b> | <b>17</b>       | <b>18</b> | <b>19</b> | <b>20</b> | <b>17</b>        | <b>18</b> | <b>19</b> | <b>20</b> |
| 0.24                   | 0.25      | 0.27      | 0.20      | 0.22            | 0.24      | 0.27      | 0.23      | 0.18             | 0.24      | 0.25      | 0.19      |
| <b>July</b>            |           |           |           | <b>August</b>   |           |           |           | <b>September</b> |           |           |           |
| <b>17</b>              | <b>18</b> | <b>19</b> | <b>20</b> | <b>17</b>       | <b>18</b> | <b>19</b> | <b>20</b> | <b>17</b>        | <b>18</b> | <b>19</b> | <b>20</b> |
| 0.20                   | 0.23      | 0.20      | 0.20      | 0.22            | 0.22      | 0.20      | 0.20      | 0.25             | 0.23      | 0.21      | 0.19      |
| <b>October</b>         |           |           |           | <b>November</b> |           |           |           | <b>December</b>  |           |           |           |
| <b>17</b>              | <b>18</b> | <b>19</b> | <b>20</b> | <b>17</b>       | <b>18</b> | <b>19</b> | <b>20</b> | <b>17</b>        | <b>18</b> | <b>19</b> | <b>20</b> |
| 0.21                   | 0.19      | 0.21      | 0.19      | 0.21            | 0.23      | 0.21      | 0.22      | 0.20             | 0.21      | 0.23      | 0.18      |

**Table S6. Hamilton Mountain (U)**

| <b>Median O<sub>3</sub> (ppb)</b> |             |             |             |                 |             |             |             |                  |             |             |             |
|-----------------------------------|-------------|-------------|-------------|-----------------|-------------|-------------|-------------|------------------|-------------|-------------|-------------|
| <b>April</b>                      |             |             |             | <b>May</b>      |             |             |             | <b>June</b>      |             |             |             |
| <b>2017</b>                       | <b>2018</b> | <b>2019</b> | <b>2020</b> | <b>2017</b>     | <b>2018</b> | <b>2019</b> | <b>2020</b> | <b>2017</b>      | <b>2018</b> | <b>2019</b> | <b>2020</b> |
| 31.1                              | 34.8        | 32.3        | 36.4        | 31.8            | 39.0        | 29.7        | 31.4        | 30.7             | 34.2        | 32.9        | 37.5        |
| <b>July</b>                       |             |             |             | <b>August</b>   |             |             |             | <b>September</b> |             |             |             |
| <b>17</b>                         | <b>18</b>   | <b>19</b>   | <b>20</b>   | <b>17</b>       | <b>18</b>   | <b>19</b>   | <b>20</b>   | <b>17</b>        | <b>18</b>   | <b>19</b>   | <b>20</b>   |
| 30.8                              | 36.1        | 32.5        | 31.9        | 30.8            | 34.0        | 28.0        | 26.0        | 25.1             | 23.0        | 23.8        | 26.4        |
| <b>October</b>                    |             |             |             | <b>November</b> |             |             |             | <b>December</b>  |             |             |             |
| <b>17</b>                         | <b>18</b>   | <b>19</b>   | <b>20</b>   | <b>17</b>       | <b>18</b>   | <b>19</b>   | <b>20</b>   | <b>17</b>        | <b>18</b>   | <b>19</b>   | <b>20</b>   |
| 25.4                              | 22.7        | 18.4        | 21.0        | 23.4            | 18.7        | 19.5        | 27          | 24.8             | 16.6        | 20.8        | 23.7        |

| <b>Median PM<sub>2.5</sub> (µg m<sup>-3</sup>)</b> |           |           |           |                 |           |           |           |                  |           |           |           |
|----------------------------------------------------|-----------|-----------|-----------|-----------------|-----------|-----------|-----------|------------------|-----------|-----------|-----------|
| <b>April</b>                                       |           |           |           | <b>May</b>      |           |           |           | <b>June</b>      |           |           |           |
| <b>17</b>                                          | <b>18</b> | <b>19</b> | <b>20</b> | <b>17</b>       | <b>18</b> | <b>19</b> | <b>20</b> | <b>17</b>        | <b>18</b> | <b>19</b> | <b>20</b> |
| 6.6                                                | 6.1       | 7.5       | 5.4       | 5.7             | 10.2      | 8.6       | 6.3       | 5.0              | 6.3       | 9.1       | 7.8       |
| <b>July</b>                                        |           |           |           | <b>August</b>   |           |           |           | <b>September</b> |           |           |           |
| <b>17</b>                                          | <b>18</b> | <b>19</b> | <b>20</b> | <b>17</b>       | <b>18</b> | <b>19</b> | <b>20</b> | <b>17</b>        | <b>18</b> | <b>19</b> | <b>20</b> |
| 7.7                                                | 7.0       | 7.9       | 7.3       | 8.3             | 8.5       | 5.2       | 6.9       | 8.3              | 4.5       | 5.0       | 5.1       |
| <b>October</b>                                     |           |           |           | <b>November</b> |           |           |           |                  |           |           |           |
| <b>17</b>                                          | <b>18</b> | <b>19</b> | <b>20</b> | <b>17</b>       | <b>18</b> | <b>19</b> | <b>20</b> | <b>17</b>        | <b>18</b> | <b>19</b> | <b>20</b> |
| 5.5                                                | 4.2       | 4.8       | 4.1       | 7.0             | 6.0       | 6.5       | 7.3       | 5.9              | 8.1       | 6.9       | 6.7       |

| <b>Median NO<sub>2</sub> (ppb)</b> |           |           |           |                 |           |           |           |                  |           |           |           |
|------------------------------------|-----------|-----------|-----------|-----------------|-----------|-----------|-----------|------------------|-----------|-----------|-----------|
| <b>April</b>                       |           |           |           | <b>May</b>      |           |           |           | <b>June</b>      |           |           |           |
| <b>17</b>                          | <b>18</b> | <b>19</b> | <b>20</b> | <b>17</b>       | <b>18</b> | <b>19</b> | <b>20</b> | <b>17</b>        | <b>18</b> | <b>19</b> | <b>20</b> |
| 8.6                                | 8.5       | 9.0       | 6.3       | 6.7             | 7.9       | 9.1       | 7.5       | 5.9              | 6.0       | 7.4       | 4.3       |
| <b>July</b>                        |           |           |           | <b>August</b>   |           |           |           | <b>September</b> |           |           |           |
| <b>17</b>                          | <b>18</b> | <b>19</b> | <b>20</b> | <b>17</b>       | <b>18</b> | <b>19</b> | <b>20</b> | <b>17</b>        | <b>18</b> | <b>19</b> | <b>20</b> |
| 6.5                                | 4.8       | 5.0       | 4.5       | 6.0             | 4.5       | 4.5       | 5.4       | 10.3             | 4.6       | 6.9       | 4.3       |
| <b>October</b>                     |           |           |           | <b>November</b> |           |           |           | <b>December</b>  |           |           |           |
| <b>17</b>                          | <b>18</b> | <b>19</b> | <b>20</b> | <b>17</b>       | <b>18</b> | <b>19</b> | <b>20</b> | <b>17</b>        | <b>18</b> | <b>19</b> | <b>20</b> |
| 5.0                                | 5.7       | 9.1       | 6.5       | 7.4             | 10.4      | 9.3       | 5.1       | 9.0              | 9.0       | 11.5      | 6.0       |

**Table S7. Hamilton West (U)**

| <b>Median O<sub>3</sub> (ppb)</b> |             |             |             |                 |             |             |             |                  |             |             |             |
|-----------------------------------|-------------|-------------|-------------|-----------------|-------------|-------------|-------------|------------------|-------------|-------------|-------------|
| <b>April</b>                      |             |             |             | <b>May</b>      |             |             |             | <b>June</b>      |             |             |             |
| <b>2017</b>                       | <b>2018</b> | <b>2019</b> | <b>2020</b> | <b>2017</b>     | <b>2018</b> | <b>2019</b> | <b>2020</b> | <b>2017</b>      | <b>2018</b> | <b>2019</b> | <b>2020</b> |
| 28.0                              | 33.5        | 29.1        | 31.8        | 28.9            | 33.8        | 25.6        | 28.3        | 27.4             | 24.6        | 25.3        | 33.8        |
| <b>July</b>                       |             |             |             | <b>August</b>   |             |             |             | <b>September</b> |             |             |             |
| <b>17</b>                         | <b>18</b>   | <b>19</b>   | <b>20</b>   | <b>17</b>       | <b>18</b>   | <b>19</b>   | <b>20</b>   | <b>17</b>        | <b>18</b>   | <b>19</b>   | <b>20</b>   |
| 24.8                              | 29.3        | 26.5        | 27.1        | 23.8            | 29.7        | 21.8        | 20.8        | 19.3             | 19.3        | 17.4        | 23.0        |
| <b>October</b>                    |             |             |             | <b>November</b> |             |             |             | <b>December</b>  |             |             |             |
| <b>17</b>                         | <b>18</b>   | <b>19</b>   | <b>20</b>   | <b>17</b>       | <b>18</b>   | <b>19</b>   | <b>20</b>   | <b>17</b>        | <b>18</b>   | <b>19</b>   | <b>20</b>   |
| 20.9                              | 19.1        | 14.9        | 18.2        | 19.5            | 16.2        | 16.4        | 22.1        | 21.1             | 17.3        | 17.3        | 19.8        |

| <b>Median PM<sub>2.5</sub> (µg m<sup>-3</sup>)</b> |           |           |           |                 |           |           |           |                  |           |           |           |
|----------------------------------------------------|-----------|-----------|-----------|-----------------|-----------|-----------|-----------|------------------|-----------|-----------|-----------|
| <b>April</b>                                       |           |           |           | <b>May</b>      |           |           |           | <b>June</b>      |           |           |           |
| <b>17</b>                                          | <b>18</b> | <b>19</b> | <b>20</b> | <b>17</b>       | <b>18</b> | <b>19</b> | <b>20</b> | <b>17</b>        | <b>18</b> | <b>19</b> | <b>20</b> |
| 5.9                                                | 6.4       | 6.8       | 5.7       | 6.3             | 10.9      | 7.8       | 5.9       | 5.4              | 6.6       | 8.8       | 8.2       |
| <b>July</b>                                        |           |           |           | <b>August</b>   |           |           |           | <b>September</b> |           |           |           |
| <b>17</b>                                          | <b>18</b> | <b>19</b> | <b>20</b> | <b>17</b>       | <b>18</b> | <b>19</b> | <b>20</b> | <b>17</b>        | <b>18</b> | <b>19</b> | <b>20</b> |
| 8.3                                                | 8.0       | 8.3       | 8.1       | 9.2             | 9.0       | 5.6       | 7.8       | 9.4              | 5.2       | 5.7       | 8.1       |
| <b>October</b>                                     |           |           |           | <b>November</b> |           |           |           |                  |           |           |           |
| <b>17</b>                                          | <b>18</b> | <b>19</b> | <b>20</b> | <b>17</b>       | <b>18</b> | <b>19</b> | <b>20</b> | <b>17</b>        | <b>18</b> | <b>19</b> | <b>20</b> |
| 5.9                                                | 5.3       | 5.4       | 6.1       | 6.5             | 6.0       | 6.2       | 8.9       | 5.3              | 9.2       | 7.6       | 5.8       |

| <b>Median NO<sub>2</sub> (ppb)</b> |           |           |           |                 |           |           |           |                  |           |           |           |
|------------------------------------|-----------|-----------|-----------|-----------------|-----------|-----------|-----------|------------------|-----------|-----------|-----------|
| <b>April</b>                       |           |           |           | <b>May</b>      |           |           |           | <b>June</b>      |           |           |           |
| <b>17</b>                          | <b>18</b> | <b>19</b> | <b>20</b> | <b>17</b>       | <b>18</b> | <b>19</b> | <b>20</b> | <b>17</b>        | <b>18</b> | <b>19</b> | <b>20</b> |
| 8.3                                | 11.3      | 12.1      | 8.4       | 10.7            | 12.4      | 11.7      | 9.2       | 7.9              | 9.2       | 13.3      | 8.0       |
| <b>July</b>                        |           |           |           | <b>August</b>   |           |           |           | <b>September</b> |           |           |           |
| <b>17</b>                          | <b>18</b> | <b>19</b> | <b>20</b> | <b>17</b>       | <b>18</b> | <b>19</b> | <b>20</b> | <b>17</b>        | <b>18</b> | <b>19</b> | <b>20</b> |
| 8.9                                | 10.0      | 7.5       | 7.3       | 8.4             | 6.0       | 7.6       | 7.6       | 13.3             | 8.1       | 9.3       | 6.2       |
| <b>October</b>                     |           |           |           | <b>November</b> |           |           |           | <b>December</b>  |           |           |           |
| <b>17</b>                          | <b>18</b> | <b>19</b> | <b>20</b> | <b>17</b>       | <b>18</b> | <b>19</b> | <b>20</b> | <b>17</b>        | <b>18</b> | <b>19</b> | <b>20</b> |
| 9.2                                | 9.5       | 10.3      | 8.8       | 13              | 12.2      | 11.3      | 9.7       | 12.6             | 12.3      | 12.0      | 10.8      |

**Table S8. Kitchener (U)**

| <b>Median O<sub>3</sub> (ppb)</b> |             |             |             |                 |             |             |             |                  |             |             |             |
|-----------------------------------|-------------|-------------|-------------|-----------------|-------------|-------------|-------------|------------------|-------------|-------------|-------------|
| <b>April</b>                      |             |             |             | <b>May</b>      |             |             |             | <b>June</b>      |             |             |             |
| <b>2017</b>                       | <b>2018</b> | <b>2019</b> | <b>2020</b> | <b>2017</b>     | <b>2018</b> | <b>2019</b> | <b>2020</b> | <b>2017</b>      | <b>2018</b> | <b>2019</b> | <b>2020</b> |
| 33.7                              | 35.8        | 34.5        | 33.9        | 33.3            | 38.3        | 31.0        | 32.5        | 29.9             | 33.3        | 31.1        | 34.6        |
| <b>July</b>                       |             |             |             | <b>August</b>   |             |             |             | <b>September</b> |             |             |             |
| <b>17</b>                         | <b>18</b>   | <b>19</b>   | <b>20</b>   | <b>17</b>       | <b>18</b>   | <b>19</b>   | <b>20</b>   | <b>17</b>        | <b>18</b>   | <b>19</b>   | <b>20</b>   |
| 29.5                              | 32.2        | 29.1        | 26.9        | 30.1            | 26.5        | 27.9        | 25.5        | 24.0             | 19.6        | 22.5        | 24.2        |
| <b>October</b>                    |             |             |             | <b>November</b> |             |             |             | <b>December</b>  |             |             |             |
| <b>17</b>                         | <b>18</b>   | <b>19</b>   | <b>20</b>   | <b>17</b>       | <b>18</b>   | <b>19</b>   | <b>20</b>   | <b>17</b>        | <b>18</b>   | <b>19</b>   | <b>20</b>   |
| 23.6                              | 20.3        | 18.2        | 21.3        | 21.2            | 18.4        | 22.3        | 25.3        | 25.5             | 18.0        | 20.7        | 23.2        |

| <b>Median PM<sub>2.5</sub> (µg m<sup>-3</sup>)</b> |           |           |           |                 |           |           |           |                  |           |           |           |
|----------------------------------------------------|-----------|-----------|-----------|-----------------|-----------|-----------|-----------|------------------|-----------|-----------|-----------|
| <b>April</b>                                       |           |           |           | <b>May</b>      |           |           |           | <b>June</b>      |           |           |           |
| <b>17</b>                                          | <b>18</b> | <b>19</b> | <b>20</b> | <b>17</b>       | <b>18</b> | <b>19</b> | <b>20</b> | <b>17</b>        | <b>18</b> | <b>19</b> | <b>20</b> |
| 4.2                                                | 5.6       | 5.2       | 4.7       | 3.5             | 7.7       | 5.7       | 4.3       | 4.8              | 6.5       | 6.3       | 7.0       |
| <b>July</b>                                        |           |           |           | <b>August</b>   |           |           |           | <b>September</b> |           |           |           |
| <b>17</b>                                          | <b>18</b> | <b>19</b> | <b>20</b> | <b>17</b>       | <b>18</b> | <b>19</b> | <b>20</b> | <b>17</b>        | <b>18</b> | <b>19</b> | <b>20</b> |
| 7.0                                                | 7.5       | 7.9       | 7.9       | 6.8             | 7.4       | 5.5       | 5.4       | 7.8              | 4.6       | 5.1       | 4.6       |
| <b>October</b>                                     |           |           |           | <b>November</b> |           |           |           | <b>December</b>  |           |           |           |
| <b>17</b>                                          | <b>18</b> | <b>19</b> | <b>20</b> | <b>17</b>       | <b>18</b> | <b>19</b> | <b>20</b> | <b>17</b>        | <b>18</b> | <b>19</b> | <b>20</b> |
| 5.6                                                | 5.1       | 4.3       | 4.2       | 7.1             | 4.5       | 7.0       | 7.4       | 5.8              | 8.8       | 8.5       | 6.3       |

| <b>Median NO<sub>2</sub> (ppb)</b> |           |           |           |                 |           |           |           |                  |           |           |           |
|------------------------------------|-----------|-----------|-----------|-----------------|-----------|-----------|-----------|------------------|-----------|-----------|-----------|
| <b>April</b>                       |           |           |           | <b>May</b>      |           |           |           | <b>June</b>      |           |           |           |
| <b>17</b>                          | <b>18</b> | <b>19</b> | <b>20</b> | <b>17</b>       | <b>18</b> | <b>19</b> | <b>20</b> | <b>17</b>        | <b>18</b> | <b>19</b> | <b>20</b> |
| 4.1                                | 6.6       | 6.1       | 4.1       | 4.7             | 4.8       | 4.9       | 3.4       | 4.2              | 3.9       | 4.2       | 3.5       |
| <b>July</b>                        |           |           |           | <b>August</b>   |           |           |           | <b>September</b> |           |           |           |
| <b>17</b>                          | <b>18</b> | <b>19</b> | <b>20</b> | <b>17</b>       | <b>18</b> | <b>19</b> | <b>20</b> | <b>17</b>        | <b>18</b> | <b>19</b> | <b>20</b> |
| 3.6                                | 3.7       | 3.2       | 2.6       | 3.9             | 3.7       | 3.4       | 3.6       | 5.2              | 3.4       | 4.5       | 3.0       |
| <b>October</b>                     |           |           |           | <b>November</b> |           |           |           | <b>December</b>  |           |           |           |
| <b>17</b>                          | <b>18</b> | <b>19</b> | <b>20</b> | <b>17</b>       | <b>18</b> | <b>19</b> | <b>20</b> | <b>17</b>        | <b>18</b> | <b>19</b> | <b>20</b> |
| 5.7                                | 5.1       | 6.4       | 3.7       | 8.0             | 7.6       | 6.6       | 5.5       | 8.6              | 8.7       | 7.5       | 5.9       |

**Table S9. London (U)**

| <b>Median O<sub>3</sub> (ppb)</b> |             |             |             |                 |             |             |             |                  |             |             |             |
|-----------------------------------|-------------|-------------|-------------|-----------------|-------------|-------------|-------------|------------------|-------------|-------------|-------------|
| <b>April</b>                      |             |             |             | <b>May</b>      |             |             |             | <b>June</b>      |             |             |             |
| <b>2017</b>                       | <b>2018</b> | <b>2019</b> | <b>2020</b> | <b>2017</b>     | <b>2018</b> | <b>2019</b> | <b>2020</b> | <b>2017</b>      | <b>2018</b> | <b>2019</b> | <b>2020</b> |
| 31.9                              | 35.5        | 34.0        | 34.5        | 32.9            | 36.2        | 29.9        | 31.4        | 30.9             | 33.7        | 31.7        | 33.4        |
| <b>July</b>                       |             |             |             | <b>August</b>   |             |             |             | <b>September</b> |             |             |             |
| <b>17</b>                         | <b>18</b>   | <b>19</b>   | <b>20</b>   | <b>17</b>       | <b>18</b>   | <b>19</b>   | <b>20</b>   | <b>17</b>        | <b>18</b>   | <b>19</b>   | <b>20</b>   |
| 29.2                              | 28.6        | 26          | 29.9        | 32.7            | 28.5        | 25.7        | 22.0        | 23.2             | 18.6        | 23.4        | 24.5        |
| <b>October</b>                    |             |             |             | <b>November</b> |             |             |             |                  |             |             |             |
| <b>17</b>                         | <b>18</b>   | <b>19</b>   | <b>20</b>   | <b>17</b>       | <b>18</b>   | <b>19</b>   | <b>20</b>   | <b>17</b>        | <b>18</b>   | <b>19</b>   | <b>20</b>   |
| 22.6                              | 22.7        | 18.7        | 20.6        | 22.3            | 20.3        | 21.8        | 24.6        | 24.1             | 19.4        | 22.4        | 22.7        |

| <b>Median PM<sub>2.5</sub> (µg m<sup>-3</sup>)</b> |           |           |           |                 |           |           |           |                  |           |           |           |
|----------------------------------------------------|-----------|-----------|-----------|-----------------|-----------|-----------|-----------|------------------|-----------|-----------|-----------|
| <b>April</b>                                       |           |           |           | <b>May</b>      |           |           |           | <b>June</b>      |           |           |           |
| <b>17</b>                                          | <b>18</b> | <b>19</b> | <b>20</b> | <b>17</b>       | <b>18</b> | <b>19</b> | <b>20</b> | <b>17</b>        | <b>18</b> | <b>19</b> | <b>20</b> |
| 6.3                                                | 5.7       | 5.7       | 3.9       | 5.5             | 8.4       | 6.3       | 5.3       | 5.1              | 6.6       | 4.1       | 7.0       |
| <b>July</b>                                        |           |           |           | <b>August</b>   |           |           |           | <b>September</b> |           |           |           |
| <b>17</b>                                          | <b>18</b> | <b>19</b> | <b>20</b> | <b>17</b>       | <b>18</b> | <b>19</b> | <b>20</b> | <b>17</b>        | <b>18</b> | <b>19</b> | <b>20</b> |
| 6.4                                                | 7.8       | 5.3       | 5.6       | 8.0             | 8.3       | 3.8       | 4.5       | 7.3              | 4.5       | 5.1       | 4.5       |
| <b>October</b>                                     |           |           |           | <b>November</b> |           |           |           | <b>December</b>  |           |           |           |
| <b>17</b>                                          | <b>18</b> | <b>19</b> | <b>20</b> | <b>17</b>       | <b>18</b> | <b>19</b> | <b>20</b> | <b>17</b>        | <b>18</b> | <b>19</b> | <b>20</b> |
| 5.4                                                | 4.7       | 4.8       | 4.9       | 6.3             | 4.6       | 4.6       | 6.9       | 4.4              | 7.6       | 6.9       | 6.0       |

| <b>Median NO<sub>2</sub> (ppb)</b> |           |           |           |                 |           |           |           |                  |           |           |           |
|------------------------------------|-----------|-----------|-----------|-----------------|-----------|-----------|-----------|------------------|-----------|-----------|-----------|
| <b>April</b>                       |           |           |           | <b>May</b>      |           |           |           | <b>June</b>      |           |           |           |
| <b>17</b>                          | <b>18</b> | <b>19</b> | <b>20</b> | <b>17</b>       | <b>18</b> | <b>19</b> | <b>20</b> | <b>17</b>        | <b>18</b> | <b>19</b> | <b>20</b> |
| 4.7                                | 6.6       | 5.1       | 3.6       | 4.5             | 5.2       | 4.3       | 3.8       | 4.1              | 4.2       | 4.7       | 3.5       |
| <b>July</b>                        |           |           |           | <b>August</b>   |           |           |           | <b>September</b> |           |           |           |
| <b>17</b>                          | <b>18</b> | <b>19</b> | <b>20</b> | <b>17</b>       | <b>18</b> | <b>19</b> | <b>20</b> | <b>17</b>        | <b>18</b> | <b>19</b> | <b>20</b> |
| 4.1                                | 4.4       | 3.9       | 2.9       | 4.7             | 3.6       | 3.2       | 2.7       | 5.7              | 3.9       | 4.2       | 3.9       |
| <b>October</b>                     |           |           |           | <b>November</b> |           |           |           |                  |           |           |           |
| <b>17</b>                          | <b>18</b> | <b>19</b> | <b>20</b> | <b>17</b>       | <b>18</b> | <b>19</b> | <b>20</b> | <b>17</b>        | <b>18</b> | <b>19</b> | <b>20</b> |
| 5.5                                | 4.9       | 4.6       | 4.2       | 7.0             | 5.6       | 8.0       | 5.5       | 5.3              | 8.7       | 6.4       | 5.5       |

**Table S10. Ottawa Downtown (U)**

| <b>Median O<sub>3</sub> (ppb)</b> |             |             |             |                 |             |             |             |                  |             |             |             |
|-----------------------------------|-------------|-------------|-------------|-----------------|-------------|-------------|-------------|------------------|-------------|-------------|-------------|
| <b>April</b>                      |             |             |             | <b>May</b>      |             |             |             | <b>June</b>      |             |             |             |
| <b>2017</b>                       | <b>2018</b> | <b>2019</b> | <b>2020</b> | <b>2017</b>     | <b>2018</b> | <b>2019</b> | <b>2020</b> | <b>2017</b>      | <b>2018</b> | <b>2019</b> | <b>2020</b> |
| 32.1                              | 35.8        | 34.2        | 34.6        | 28.4            | 35.4        | 29.7        | 32.7        | 24.6             | 25.7        | 25.5        | 29.8        |
| <b>July</b>                       |             |             |             | <b>August</b>   |             |             |             | <b>September</b> |             |             |             |
| <b>17</b>                         | <b>18</b>   | <b>19</b>   | <b>20</b>   | <b>17</b>       | <b>18</b>   | <b>19</b>   | <b>20</b>   | <b>17</b>        | <b>18</b>   | <b>19</b>   | <b>20</b>   |
| 23.4                              | 29.1        | 25.4        | 23.1        | 21.9            | 24.8        | 25.1        | 17.9        | 22.0             | 20.2        | 19.5        | 18.7        |
| <b>October</b>                    |             |             |             | <b>November</b> |             |             |             | <b>December</b>  |             |             |             |
| <b>17</b>                         | <b>18</b>   | <b>19</b>   | <b>20</b>   | <b>17</b>       | <b>18</b>   | <b>19</b>   | <b>20</b>   | <b>17</b>        | <b>18</b>   | <b>19</b>   | <b>20</b>   |
| 20.3                              | 19.0        | 18          | 18.8        | 19.8            | 17.4        | 23.3        | 21.4        | 24.6             | 18.8        | 23.9        | 19.3        |

| <b>Median PM<sub>2.5</sub> (µg m<sup>-3</sup>)</b> |           |           |           |                 |           |           |           |                  |           |           |           |
|----------------------------------------------------|-----------|-----------|-----------|-----------------|-----------|-----------|-----------|------------------|-----------|-----------|-----------|
| <b>April</b>                                       |           |           |           | <b>May</b>      |           |           |           | <b>June</b>      |           |           |           |
| <b>17</b>                                          | <b>18</b> | <b>19</b> | <b>20</b> | <b>17</b>       | <b>18</b> | <b>19</b> | <b>20</b> | <b>17</b>        | <b>18</b> | <b>19</b> | <b>20</b> |
| 4.1                                                | 4.5       | 4.1       | 4.6       | 3.8             | 6.0       | 5.0       | 3.9       | 3.7              | 3.8       | 5.0       | 5.9       |
| <b>July</b>                                        |           |           |           | <b>August</b>   |           |           |           | <b>September</b> |           |           |           |
| <b>17</b>                                          | <b>18</b> | <b>19</b> | <b>20</b> | <b>17</b>       | <b>18</b> | <b>19</b> | <b>20</b> | <b>17</b>        | <b>18</b> | <b>19</b> | <b>20</b> |
| 5.4                                                | 5.3       | 8.3       | 5.9       | 5.4             | 7.2       | 4.9       | 3.8       | 7.2              | 4.0       | 4.0       | 3.9       |
| <b>October</b>                                     |           |           |           | <b>November</b> |           |           |           |                  |           |           |           |
| <b>17</b>                                          | <b>18</b> | <b>19</b> | <b>20</b> | <b>17</b>       | <b>18</b> | <b>19</b> | <b>20</b> | <b>17</b>        | <b>18</b> | <b>19</b> | <b>20</b> |
| 4.2                                                | 3.7       | 4.3       | 4.6       | 4.9             | 3.8       | 4.3       | 6.7       | 4.6              | 6.3       | 5.1       | 4.9       |

| <b>Median NO<sub>2</sub> (ppb)</b> |           |           |           |                 |           |           |           |                  |           |           |           |
|------------------------------------|-----------|-----------|-----------|-----------------|-----------|-----------|-----------|------------------|-----------|-----------|-----------|
| <b>April</b>                       |           |           |           | <b>May</b>      |           |           |           | <b>June</b>      |           |           |           |
| <b>17</b>                          | <b>18</b> | <b>19</b> | <b>20</b> | <b>17</b>       | <b>18</b> | <b>19</b> | <b>20</b> | <b>17</b>        | <b>18</b> | <b>19</b> | <b>20</b> |
| 4.7                                | 7.4       | 4.9       | 4.3       | 4.5             | 5.2       | 4.1       | 3.8       | 3.8              | 4.4       | 4.3       | 3.4       |
| <b>July</b>                        |           |           |           | <b>August</b>   |           |           |           | <b>September</b> |           |           |           |
| <b>17</b>                          | <b>18</b> | <b>19</b> | <b>20</b> | <b>17</b>       | <b>18</b> | <b>19</b> | <b>20</b> | <b>17</b>        | <b>18</b> | <b>19</b> | <b>20</b> |
| 3.9                                | 4.2       | 3.9       | 2.9       | 4.5             | 4.0       | 3.0       | 2.4       | 6.5              | 4.5       | 3.7       | 3.0       |
| <b>October</b>                     |           |           |           | <b>November</b> |           |           |           | <b>December</b>  |           |           |           |
| <b>17</b>                          | <b>18</b> | <b>19</b> | <b>20</b> | <b>17</b>       | <b>18</b> | <b>19</b> | <b>20</b> | <b>17</b>        | <b>18</b> | <b>19</b> | <b>20</b> |
| 6.4                                | 4.7       | 6.3       | 5.2       | 11              | 7.9       | 7.7       | 9.8       | 8.6              | 12        | 7.8       | 6.6       |

| <b>Median CO (ppm)</b> |           |           |           |                 |           |           |           |                  |           |           |           |
|------------------------|-----------|-----------|-----------|-----------------|-----------|-----------|-----------|------------------|-----------|-----------|-----------|
| <b>April</b>           |           |           |           | <b>May</b>      |           |           |           | <b>June</b>      |           |           |           |
| <b>17</b>              | <b>18</b> | <b>19</b> | <b>20</b> | <b>17</b>       | <b>18</b> | <b>19</b> | <b>20</b> | <b>17</b>        | <b>18</b> | <b>19</b> | <b>20</b> |
| 0.19                   | 0.20      | 0.18      | 0.215     | 0.17            | 0.20      | 0.16      | 0.15      | 0.14             | 0.16      | 0.17      | 0.15      |
| <b>July</b>            |           |           |           | <b>August</b>   |           |           |           | <b>September</b> |           |           |           |
| <b>17</b>              | <b>18</b> | <b>19</b> | <b>20</b> | <b>17</b>       | <b>18</b> | <b>19</b> | <b>20</b> | <b>17</b>        | <b>18</b> | <b>19</b> | <b>20</b> |
| 0.16                   | 0.16      | 0.16      | 0.15      | 0.19            | 0.2       | 0.16      | 0.16      | 0.23             | 0.17      | 0.17      | 0.17      |
| <b>October</b>         |           |           |           | <b>November</b> |           |           |           | <b>Decemeber</b> |           |           |           |
| <b>17</b>              | <b>18</b> | <b>19</b> | <b>20</b> | <b>17</b>       | <b>18</b> | <b>19</b> | <b>20</b> | <b>17</b>        | <b>18</b> | <b>19</b> | <b>20</b> |
| 0.17                   | 0.15      | 0.17      | 0.18      | 0.21            | 0.18      | 0.15      | 0.22      | 0.18             | 0.20      | 0.16      | 0.19      |



**Table S11. Parry Sound (U)**

| <b>Median O<sub>3</sub> (ppb)</b> |             |             |             |                 |             |             |             |                  |             |             |             |
|-----------------------------------|-------------|-------------|-------------|-----------------|-------------|-------------|-------------|------------------|-------------|-------------|-------------|
| <b>April</b>                      |             |             |             | <b>May</b>      |             |             |             | <b>June</b>      |             |             |             |
| <b>2017</b>                       | <b>2018</b> | <b>2019</b> | <b>2020</b> | <b>2017</b>     | <b>2018</b> | <b>2019</b> | <b>2020</b> | <b>2017</b>      | <b>2018</b> | <b>2019</b> | <b>2020</b> |
| 34.7                              | 40.8        | 36.7        | 38.4        | 31.9            | 38.6        | 29.6        | 35.5        | 28.5             | 29.2        | 26.9        | 32.0        |
| <b>July</b>                       |             |             |             | <b>August</b>   |             |             |             | <b>September</b> |             |             |             |
| <b>17</b>                         | <b>18</b>   | <b>19</b>   | <b>20</b>   | <b>17</b>       | <b>18</b>   | <b>19</b>   | <b>20</b>   | <b>17</b>        | <b>18</b>   | <b>19</b>   | <b>20</b>   |
| 24.2                              | 32.3        | 30.2        | 25.6        | 23.6            | 29.1        | 24.3        | 20.8        | 22.0             | 20.1        | 21.5        | 24.5        |
| <b>October</b>                    |             |             |             | <b>November</b> |             |             |             |                  |             |             |             |
| <b>17</b>                         | <b>18</b>   | <b>19</b>   | <b>20</b>   | <b>17</b>       | <b>18</b>   | <b>19</b>   | <b>20</b>   | <b>17</b>        | <b>18</b>   | <b>19</b>   | <b>20</b>   |
| 26.6                              | 23.6        | 22.1        | 24.3        | 26.3            | 22.3        | 27.8        | 27.1        | 30.3             | 27.2        | 27.5        | 26.5        |

| <b>Median PM<sub>2.5</sub> (µg m<sup>-3</sup>)</b> |           |           |           |                 |           |           |           |                  |           |           |           |
|----------------------------------------------------|-----------|-----------|-----------|-----------------|-----------|-----------|-----------|------------------|-----------|-----------|-----------|
| <b>April</b>                                       |           |           |           | <b>May</b>      |           |           |           | <b>June</b>      |           |           |           |
| <b>17</b>                                          | <b>18</b> | <b>19</b> | <b>20</b> | <b>17</b>       | <b>18</b> | <b>19</b> | <b>20</b> | <b>17</b>        | <b>18</b> | <b>19</b> | <b>20</b> |
| 3.0                                                | 4.5       | 3.8       | 3.1       | 2.0             | 5.5       | 3.6       | 4.1       | 3.0              | 3.3       | 4.5       | 5.7       |
| <b>July</b>                                        |           |           |           | <b>August</b>   |           |           |           | <b>September</b> |           |           |           |
| <b>17</b>                                          | <b>18</b> | <b>19</b> | <b>20</b> | <b>17</b>       | <b>18</b> | <b>19</b> | <b>20</b> | <b>17</b>        | <b>18</b> | <b>19</b> | <b>20</b> |
| 4.5                                                | 6.0       | 6.2       | 5.1       | 5.5             | 8.0       | 4.0       | 3.1       | 6.0              | 2.3       | 3.3       | 3.8       |
| <b>October</b>                                     |           |           |           | <b>November</b> |           |           |           |                  |           |           |           |
| <b>17</b>                                          | <b>18</b> | <b>19</b> | <b>20</b> | <b>17</b>       | <b>18</b> | <b>19</b> | <b>20</b> | <b>17</b>        | <b>18</b> | <b>19</b> | <b>20</b> |
| 4.1                                                | 2.0       | 2.1       | 1.6       | 4.3             | 1.4       | 1.2       | 4.1       | 2.3              | 4.3       | 4.1       | 2.9       |

| <b>Median NO<sub>2</sub> (ppb)</b> |           |           |           |                 |           |           |           |                  |           |           |           |
|------------------------------------|-----------|-----------|-----------|-----------------|-----------|-----------|-----------|------------------|-----------|-----------|-----------|
| <b>April</b>                       |           |           |           | <b>May</b>      |           |           |           | <b>June</b>      |           |           |           |
| <b>17</b>                          | <b>18</b> | <b>19</b> | <b>20</b> | <b>17</b>       | <b>18</b> | <b>19</b> | <b>20</b> | <b>17</b>        | <b>18</b> | <b>19</b> | <b>20</b> |
| 1.7                                | 2.6       | 2.0       | 1.9       | 1.9             | 2.5       | 1.7       | 1.7       | 2.0              | 2.2       | 1.9       | 1.9       |
| <b>July</b>                        |           |           |           | <b>August</b>   |           |           |           | <b>September</b> |           |           |           |
| <b>17</b>                          | <b>18</b> | <b>19</b> | <b>20</b> | <b>17</b>       | <b>18</b> | <b>19</b> | <b>20</b> | <b>17</b>        | <b>18</b> | <b>19</b> | <b>20</b> |
| 1.8                                | 2.0       | 1.6       | 1.6       | 2.3             | 2.2       | 2.3       | 2.3       | 2.7              | 1.8       | 2.2       | 2.2       |
| <b>October</b>                     |           |           |           | <b>November</b> |           |           |           | <b>December</b>  |           |           |           |
| <b>17</b>                          | <b>18</b> | <b>19</b> | <b>20</b> | <b>17</b>       | <b>18</b> | <b>19</b> | <b>20</b> | <b>17</b>        | <b>18</b> | <b>19</b> | <b>20</b> |
| 1.7                                | 2.1       | 1.9       | 1.9       | 2.5             | 2.0       | 2.1       | 2.1       | 3.5              | 2.8       | 2.4       | 2.4       |

**Table S12. Sarnia (U)**

| <b>Median O<sub>3</sub> (ppb)</b> |             |             |             |                 |             |             |             |                  |             |             |             |
|-----------------------------------|-------------|-------------|-------------|-----------------|-------------|-------------|-------------|------------------|-------------|-------------|-------------|
| <b>April</b>                      |             |             |             | <b>May</b>      |             |             |             | <b>June</b>      |             |             |             |
| <b>2017</b>                       | <b>2018</b> | <b>2019</b> | <b>2020</b> | <b>2017</b>     | <b>2018</b> | <b>2019</b> | <b>2020</b> | <b>2017</b>      | <b>2018</b> | <b>2019</b> | <b>2020</b> |
| 33.7                              | 38.4        | 36.3        | 30.3        | 35.7            | 37.9        | 34.6        | 29.9        | 34.5             | 35.3        | 36.4        | 35.1        |
| <b>July</b>                       |             |             |             | <b>August</b>   |             |             |             | <b>September</b> |             |             |             |
| <b>17</b>                         | <b>18</b>   | <b>19</b>   | <b>20</b>   | <b>17</b>       | <b>18</b>   | <b>19</b>   | <b>20</b>   | <b>17</b>        | <b>18</b>   | <b>19</b>   | <b>20</b>   |
| 32.3                              | 37.1        | 36.2        | 31.6        | 31.1            | 32.5        | 29.6        | 25.1        | 25.1             | 21.8        | 25.6        | 26.1        |
| <b>October</b>                    |             |             |             | <b>November</b> |             |             |             |                  |             |             |             |
| <b>17</b>                         | <b>18</b>   | <b>19</b>   | <b>20</b>   | <b>17</b>       | <b>18</b>   | <b>19</b>   | <b>20</b>   | <b>17</b>        | <b>18</b>   | <b>19</b>   | <b>20</b>   |
| 24.4                              | 20.4        | 20.5        | 20.9        | 18.7            | 18.1        | 20.7        | 18.1        | 25.3             | 19.2        | 22.4        | 18.0        |

| <b>Median PM<sub>2.5</sub> (µg m<sup>-3</sup>)</b> |           |           |           |                 |           |           |           |                  |           |           |           |
|----------------------------------------------------|-----------|-----------|-----------|-----------------|-----------|-----------|-----------|------------------|-----------|-----------|-----------|
| <b>April</b>                                       |           |           |           | <b>May</b>      |           |           |           | <b>June</b>      |           |           |           |
| <b>17</b>                                          | <b>18</b> | <b>19</b> | <b>20</b> | <b>17</b>       | <b>18</b> | <b>19</b> | <b>20</b> | <b>17</b>        | <b>18</b> | <b>19</b> | <b>20</b> |
| 5.8                                                | 7.0       | 5.3       | 5.9       | 3.9             | 7.3       | 5.5       | 5.3       | 3.8              | 5.0       | 4.8       | 6.9       |
| <b>July</b>                                        |           |           |           | <b>August</b>   |           |           |           | <b>September</b> |           |           |           |
| <b>17</b>                                          | <b>18</b> | <b>19</b> | <b>20</b> | <b>17</b>       | <b>18</b> | <b>19</b> | <b>20</b> | <b>17</b>        | <b>18</b> | <b>19</b> | <b>20</b> |
| 6.6                                                | 6.5       | 7.7       | 8.2       | 8.3             | 6.9       | 6.0       | 6.9       | 8.3              | 6.1       | 6.3       | 5.3       |
| <b>October</b>                                     |           |           |           | <b>November</b> |           |           |           |                  |           |           |           |
| <b>17</b>                                          | <b>18</b> | <b>19</b> | <b>20</b> | <b>17</b>       | <b>18</b> | <b>19</b> | <b>20</b> | <b>17</b>        | <b>18</b> | <b>19</b> | <b>20</b> |
| 5.7                                                | 4.5       | 4.3       | 4.7       | 7.7             | 4.8       | 5.2       | 7.3       | 5.5              | 8.2       | 9.0       | 6.2       |

| <b>Median NO<sub>2</sub> (ppb)</b> |           |           |           |                 |           |           |           |                  |           |           |           |
|------------------------------------|-----------|-----------|-----------|-----------------|-----------|-----------|-----------|------------------|-----------|-----------|-----------|
| <b>April</b>                       |           |           |           | <b>May</b>      |           |           |           | <b>June</b>      |           |           |           |
| <b>17</b>                          | <b>18</b> | <b>19</b> | <b>20</b> | <b>17</b>       | <b>18</b> | <b>19</b> | <b>20</b> | <b>17</b>        | <b>18</b> | <b>19</b> | <b>20</b> |
| 5.4                                | 7.3       | 5.1       | 3.4       | 6.4             | 7.6       | 3.8       | 4.6       | 6.9              | 4.9       | 4.9       | 4.9       |
| <b>July</b>                        |           |           |           | <b>August</b>   |           |           |           | <b>September</b> |           |           |           |
| <b>17</b>                          | <b>18</b> | <b>19</b> | <b>20</b> | <b>17</b>       | <b>18</b> | <b>19</b> | <b>20</b> | <b>17</b>        | <b>18</b> | <b>19</b> | <b>20</b> |
| 6.5                                | 6.6       | 4.6       | 4.3       | 6.6             | 5.8       | 6.0       | 5.0       | 7.3              | 5.4       | 5.9       | 6.1       |
| <b>October</b>                     |           |           |           | <b>November</b> |           |           |           |                  |           |           |           |
| <b>17</b>                          | <b>18</b> | <b>19</b> | <b>20</b> | <b>17</b>       | <b>18</b> | <b>19</b> | <b>20</b> | <b>17</b>        | <b>18</b> | <b>19</b> | <b>20</b> |
| 9.0                                | 6.5       | 5.6       | 6.0       | 9.7             | 6.5       | 9.0       | 9.9       | 9.0              | 10.8      | 8.5       | 6.7       |

**Table S13. Toronto Downtown (U)**

| <b>Median O<sub>3</sub> (ppb)</b> |             |             |             |                 |             |             |             |                  |             |             |             |
|-----------------------------------|-------------|-------------|-------------|-----------------|-------------|-------------|-------------|------------------|-------------|-------------|-------------|
| <b>April</b>                      |             |             |             | <b>May</b>      |             |             |             | <b>June</b>      |             |             |             |
| <b>2017</b>                       | <b>2018</b> | <b>2019</b> | <b>2020</b> | <b>2017</b>     | <b>2018</b> | <b>2019</b> | <b>2020</b> | <b>2017</b>      | <b>2018</b> | <b>2019</b> | <b>2020</b> |
| 31.2                              | 30.2        | 33.2        | 29.6        | 30.5            | 35.6        | 29.5        | 24.8        | 26.6             | 30.3        | 29.9        | 29.7        |
| <b>July</b>                       |             |             |             | <b>August</b>   |             |             |             | <b>September</b> |             |             |             |
| <b>17</b>                         | <b>18</b>   | <b>19</b>   | <b>20</b>   | <b>17</b>       | <b>18</b>   | <b>19</b>   | <b>20</b>   | <b>17</b>        | <b>18</b>   | <b>19</b>   | <b>20</b>   |
| 26.8                              | 26.8        | 26.8        | 26.8        | 26.4            | 32.1        | 21.7        | 20.7        | 22.7             | 22.6        | 18.5        | 19.6        |
| <b>October</b>                    |             |             |             | <b>November</b> |             |             |             | <b>December</b>  |             |             |             |
| <b>17</b>                         | <b>18</b>   | <b>19</b>   | <b>20</b>   | <b>17</b>       | <b>18</b>   | <b>19</b>   | <b>20</b>   | <b>17</b>        | <b>18</b>   | <b>19</b>   | <b>20</b>   |
| 21.3                              | 18.4        | 15.4        | 16.4        | 19.1            | 14.0        | 17.1        | 20.8        | 18.6             | 13.0        | 16.1        | 6.3         |

| <b>Median PM<sub>2.5</sub> (µg m<sup>-3</sup>)</b> |           |           |           |                 |           |           |           |                  |           |           |           |
|----------------------------------------------------|-----------|-----------|-----------|-----------------|-----------|-----------|-----------|------------------|-----------|-----------|-----------|
| <b>April</b>                                       |           |           |           | <b>May</b>      |           |           |           | <b>June</b>      |           |           |           |
| <b>17</b>                                          | <b>18</b> | <b>19</b> | <b>20</b> | <b>17</b>       | <b>18</b> | <b>19</b> | <b>20</b> | <b>17</b>        | <b>18</b> | <b>19</b> | <b>20</b> |
| 5.0                                                | 6.1       | 5.9       | 6.1       | 4.5             | 8.3       | 6.6       | 6.0       | 5.6              | 6.6       | 8.5       | 8.8       |
| <b>July</b>                                        |           |           |           | <b>August</b>   |           |           |           | <b>September</b> |           |           |           |
| <b>17</b>                                          | <b>18</b> | <b>19</b> | <b>20</b> | <b>17</b>       | <b>18</b> | <b>19</b> | <b>20</b> | <b>17</b>        | <b>18</b> | <b>19</b> | <b>20</b> |
| 7.6                                                | 9.3       | 9.6       | 6.5       | 10.3            | 10.6      | 7.7       | 6.2       | 13.1             | 5.8       | 7.0       | 5.4       |
| <b>October</b>                                     |           |           |           | <b>November</b> |           |           |           |                  |           |           |           |
| <b>17</b>                                          | <b>18</b> | <b>19</b> | <b>20</b> | <b>17</b>       | <b>18</b> | <b>19</b> | <b>20</b> | <b>17</b>        | <b>18</b> | <b>19</b> | <b>20</b> |
| 6.8                                                | 4.2       | 5.9       | 5.3       | 7.6             | 4.9       | 8.0       | 6.6       | 6.1              | 10.1      | 8.8       | 14.0      |

| <b>Median NO<sub>2</sub> (ppb)</b> |           |           |           |                 |           |           |           |                  |           |           |           |
|------------------------------------|-----------|-----------|-----------|-----------------|-----------|-----------|-----------|------------------|-----------|-----------|-----------|
| <b>April</b>                       |           |           |           | <b>May</b>      |           |           |           | <b>June</b>      |           |           |           |
| <b>17</b>                          | <b>18</b> | <b>19</b> | <b>20</b> | <b>17</b>       | <b>18</b> | <b>19</b> | <b>20</b> | <b>17</b>        | <b>18</b> | <b>19</b> | <b>20</b> |
| 10.1                               | 12.3      | 8.2       | 12.1      | 10.2            | 12.0      | 8.5       | 14.2      | 11.0             | 9.1       | 13.1      | 12.7      |
| <b>July</b>                        |           |           |           | <b>August</b>   |           |           |           | <b>September</b> |           |           |           |
| <b>17</b>                          | <b>18</b> | <b>19</b> | <b>20</b> | <b>17</b>       | <b>18</b> | <b>19</b> | <b>20</b> | <b>17</b>        | <b>18</b> | <b>19</b> | <b>20</b> |
| 12.3                               | 9.6       | 14.7      | 9.7       | 9.9             | 9.1       | 12.5      | 8.8       | 14.6             | 8.5       | 13.7      | 8.1       |
| <b>October</b>                     |           |           |           | <b>November</b> |           |           |           |                  |           |           |           |
| <b>17</b>                          | <b>18</b> | <b>19</b> | <b>20</b> | <b>17</b>       | <b>18</b> | <b>19</b> | <b>20</b> | <b>17</b>        | <b>18</b> | <b>19</b> | <b>20</b> |
| 13.2                               | 11.0      | 13.0      | 12.0      | 12.7            | 14.7      | 16.5      | 12.0      | 15.1             | 15.0      | 17.1      | 18.3      |

**Table S14. Toronto East (U)**

| <b>Median O<sub>3</sub> (ppb)</b> |             |             |             |                 |             |             |             |                  |             |             |             |
|-----------------------------------|-------------|-------------|-------------|-----------------|-------------|-------------|-------------|------------------|-------------|-------------|-------------|
| <b>April</b>                      |             |             |             | <b>May</b>      |             |             |             | <b>June</b>      |             |             |             |
| <b>2017</b>                       | <b>2018</b> | <b>2019</b> | <b>2020</b> | <b>2017</b>     | <b>2018</b> | <b>2019</b> | <b>2020</b> | <b>2017</b>      | <b>2018</b> | <b>2019</b> | <b>2020</b> |
| 31.3                              | 31.4        | 32.2        | 35.0        | 27.5            | 32.3        | 27.3        | 28.4        | 23.9             | 28.5        | 26.3        | 32.4        |
| <b>July</b>                       |             |             |             | <b>August</b>   |             |             |             | <b>September</b> |             |             |             |
| <b>17</b>                         | <b>18</b>   | <b>19</b>   | <b>20</b>   | <b>17</b>       | <b>18</b>   | <b>19</b>   | <b>20</b>   | <b>17</b>        | <b>18</b>   | <b>19</b>   | <b>20</b>   |
| 22.2                              | 31.1        | 26.8        | 26.2        | 25.1            | 29.1        | 25.2        | 22.4        | 20.2             | 20.5        | 19.7        | 20.3        |
| <b>October</b>                    |             |             |             | <b>November</b> |             |             |             | <b>December</b>  |             |             |             |
| <b>17</b>                         | <b>18</b>   | <b>19</b>   | <b>20</b>   | <b>17</b>       | <b>18</b>   | <b>19</b>   | <b>20</b>   | <b>17</b>        | <b>18</b>   | <b>19</b>   | <b>20</b>   |
| 19.4                              | 17.3        | 16.8        | 17.8        | 17.4            | 15.1        | 19.1        | 22.5        | 19.8             | 14.6        | 18.5        | 19.5        |

| <b>Median PM<sub>2.5</sub> (µg m<sup>-3</sup>)</b> |           |           |           |                 |           |           |           |                  |           |           |           |
|----------------------------------------------------|-----------|-----------|-----------|-----------------|-----------|-----------|-----------|------------------|-----------|-----------|-----------|
| <b>April</b>                                       |           |           |           | <b>May</b>      |           |           |           | <b>June</b>      |           |           |           |
| <b>17</b>                                          | <b>18</b> | <b>19</b> | <b>20</b> | <b>17</b>       | <b>18</b> | <b>19</b> | <b>20</b> | <b>17</b>        | <b>18</b> | <b>19</b> | <b>20</b> |
| 5.1                                                | 5.1       | 5.5       | 4.9       | 5.0             | 8.5       | 5.8       | 4.8       | 5.8              | 5.3       | 6.8       | 7.6       |
| <b>July</b>                                        |           |           |           | <b>August</b>   |           |           |           | <b>September</b> |           |           |           |
| <b>17</b>                                          | <b>18</b> | <b>19</b> | <b>20</b> | <b>17</b>       | <b>18</b> | <b>19</b> | <b>20</b> | <b>17</b>        | <b>18</b> | <b>19</b> | <b>20</b> |
| 8.5                                                | 7.3       | 6.8       | 6.3       | 8.0             | 7.8       | 5.8       | 6.2       | 11.2             | 3.9       | 5.4       | 4.3       |
| <b>October</b>                                     |           |           |           | <b>November</b> |           |           |           | <b>December</b>  |           |           |           |
| <b>17</b>                                          | <b>18</b> | <b>19</b> | <b>20</b> | <b>17</b>       | <b>18</b> | <b>19</b> | <b>20</b> | <b>17</b>        | <b>18</b> | <b>19</b> | <b>20</b> |
| 5.2                                                | 4.3       | 4.6       | 4.5       | 6.5             | 4.8       | 6.9       | 6.5       | 5.1              | 9.7       | 7.5       | 5.0       |

| <b>Median NO<sub>2</sub> (ppb)</b> |           |           |           |                 |           |           |           |                  |           |           |           |
|------------------------------------|-----------|-----------|-----------|-----------------|-----------|-----------|-----------|------------------|-----------|-----------|-----------|
| <b>April</b>                       |           |           |           | <b>May</b>      |           |           |           | <b>June</b>      |           |           |           |
| <b>17</b>                          | <b>18</b> | <b>19</b> | <b>20</b> | <b>17</b>       | <b>18</b> | <b>19</b> | <b>20</b> | <b>17</b>        | <b>18</b> | <b>19</b> | <b>20</b> |
| 6.9                                | 9.9       | 7.9       | 6.0       | 9.1             | 8.2       | 6.7       | 6.5       | 10.9             | 7.2       | 8.9       | 7.7       |
| <b>July</b>                        |           |           |           | <b>August</b>   |           |           |           | <b>September</b> |           |           |           |
| <b>17</b>                          | <b>18</b> | <b>19</b> | <b>20</b> | <b>17</b>       | <b>18</b> | <b>19</b> | <b>20</b> | <b>17</b>        | <b>18</b> | <b>19</b> | <b>20</b> |
| 10.2                               | 8.2       | 8.0       | 5.5       | 9.5             | 8.0       | 6.9       | 6.1       | 13.1             | 6.4       | 8.3       | 6.6       |
| <b>October</b>                     |           |           |           | <b>November</b> |           |           |           | <b>December</b>  |           |           |           |
| <b>17</b>                          | <b>18</b> | <b>19</b> | <b>20</b> | <b>17</b>       | <b>18</b> | <b>19</b> | <b>20</b> | <b>17</b>        | <b>18</b> | <b>19</b> | <b>20</b> |
| 11.1                               | 8.2       | 9.0       | 9.5       | 12.2            | 11.1      | 12.3      | 10.9      | 12.6             | 13.9      | 13.4      | 12.0      |

**Table S15. Toronto North (U)**

| <b>Median O<sub>3</sub> (ppb)</b> |             |             |             |                 |             |             |             |                  |             |             |             |
|-----------------------------------|-------------|-------------|-------------|-----------------|-------------|-------------|-------------|------------------|-------------|-------------|-------------|
| <b>April</b>                      |             |             |             | <b>May</b>      |             |             |             | <b>June</b>      |             |             |             |
| <b>2017</b>                       | <b>2018</b> | <b>2019</b> | <b>2020</b> | <b>2017</b>     | <b>2018</b> | <b>2019</b> | <b>2020</b> | <b>2017</b>      | <b>2018</b> | <b>2019</b> | <b>2020</b> |
| 30.9                              | 31.3        | 31.5        | 34.4        | 29.4            | 34.3        | 26.2        | 30.1        | 25.9             | 32.0        | 25.2        | 34.1        |
| <b>July</b>                       |             |             |             | <b>August</b>   |             |             |             | <b>September</b> |             |             |             |
| <b>17</b>                         | <b>18</b>   | <b>19</b>   | <b>20</b>   | <b>17</b>       | <b>18</b>   | <b>19</b>   | <b>20</b>   | <b>17</b>        | <b>18</b>   | <b>19</b>   | <b>20</b>   |
| 23.5                              | 32.7        | 26.9        | 28.2        | 25.3            | 27.8        | 26.2        | 23.6        | 21.0             | 19.7        | 19.5        | 20.1        |
| <b>October</b>                    |             |             |             | <b>November</b> |             |             |             |                  |             |             |             |
| <b>17</b>                         | <b>18</b>   | <b>19</b>   | <b>20</b>   | <b>17</b>       | <b>18</b>   | <b>19</b>   | <b>20</b>   | <b>17</b>        | <b>18</b>   | <b>19</b>   | <b>20</b>   |
| 19.0                              | 16.4        | 16.3        | 18.9        | 14.0            | 15.0        | 19.8        | 20.8        | 20.3             | 14.6        | 16.3        | 20.3        |

| <b>Median PM<sub>2.5</sub> (µg m<sup>-3</sup>)</b> |           |           |           |                 |           |           |           |                  |           |           |           |
|----------------------------------------------------|-----------|-----------|-----------|-----------------|-----------|-----------|-----------|------------------|-----------|-----------|-----------|
| <b>April</b>                                       |           |           |           | <b>May</b>      |           |           |           | <b>June</b>      |           |           |           |
| <b>17</b>                                          | <b>18</b> | <b>19</b> | <b>20</b> | <b>17</b>       | <b>18</b> | <b>19</b> | <b>20</b> | <b>17</b>        | <b>18</b> | <b>19</b> | <b>20</b> |
| 5.3                                                | 5.4       | 5.8       | 5.4       | 5.8             | 9.1       | 5.6       | 4.9       | 5.5              | 6.4       | 7.1       | 6.3       |
| <b>July</b>                                        |           |           |           | <b>August</b>   |           |           |           | <b>September</b> |           |           |           |
| <b>17</b>                                          | <b>18</b> | <b>19</b> | <b>20</b> | <b>17</b>       | <b>18</b> | <b>19</b> | <b>20</b> | <b>17</b>        | <b>18</b> | <b>19</b> | <b>20</b> |
| 7.3                                                | 7.6       | 8.2       | 5.8       | 8.1             | 7.9       | 5.0       | 5.4       | 10.5             | 4.2       | 4.6       | 4.0       |
| <b>October</b>                                     |           |           |           | <b>November</b> |           |           |           | <b>December</b>  |           |           |           |
| <b>17</b>                                          | <b>18</b> | <b>19</b> | <b>20</b> | <b>17</b>       | <b>18</b> | <b>19</b> | <b>20</b> | <b>17</b>        | <b>18</b> | <b>19</b> | <b>20</b> |
| 6.9                                                | 4.8       | 4.8       | 4.3       | 7.1             | 5.0       | 7.3       | 8.5       | 5.1              | 8.6       | 9.1       | 5.3       |

| <b>Median NO<sub>2</sub> (ppb)</b> |           |           |           |                 |           |           |           |                  |           |           |           |
|------------------------------------|-----------|-----------|-----------|-----------------|-----------|-----------|-----------|------------------|-----------|-----------|-----------|
| <b>April</b>                       |           |           |           | <b>May</b>      |           |           |           | <b>June</b>      |           |           |           |
| <b>17</b>                          | <b>18</b> | <b>19</b> | <b>20</b> | <b>17</b>       | <b>18</b> | <b>19</b> | <b>20</b> | <b>17</b>        | <b>18</b> | <b>19</b> | <b>20</b> |
| 6.7                                | 11.4      | 10.7      | 6.4       | 8.1             | 9.1       | 7.2       | 7.6       | 8.6              | 6.6       | 8.2       | 7.5       |
| <b>July</b>                        |           |           |           | <b>August</b>   |           |           |           | <b>September</b> |           |           |           |
| <b>17</b>                          | <b>18</b> | <b>19</b> | <b>20</b> | <b>17</b>       | <b>18</b> | <b>19</b> | <b>20</b> | <b>17</b>        | <b>18</b> | <b>19</b> | <b>20</b> |
| 8.7                                | 6.4       | 8.1       | 5.1       | 7.8             | 7.5       | 5.4       | 5.6       | 11.3             | 6.2       | 7.5       | 6.8       |
| <b>October</b>                     |           |           |           | <b>November</b> |           |           |           | <b>December</b>  |           |           |           |
| <b>17</b>                          | <b>18</b> | <b>19</b> | <b>20</b> | <b>17</b>       | <b>18</b> | <b>19</b> | <b>20</b> | <b>17</b>        | <b>18</b> | <b>19</b> | <b>20</b> |
| 11.1                               | 10.9      | 9.0       | 9.5       | 13.3            | 13.3      | 12.8      | 15.1      | 13.1             | 15.8      | 15.3      | 11.5      |

**Table S16. Toronto West (U)**

| <b>Median O<sub>3</sub> (ppb)</b> |           |           |           |                 |           |           |           |                  |           |           |           |
|-----------------------------------|-----------|-----------|-----------|-----------------|-----------|-----------|-----------|------------------|-----------|-----------|-----------|
| <b>April</b>                      |           |           |           | <b>May</b>      |           |           |           | <b>June</b>      |           |           |           |
| <b>17</b>                         | <b>18</b> | <b>19</b> | <b>20</b> | <b>17</b>       | <b>18</b> | <b>19</b> | <b>20</b> | <b>17</b>        | <b>18</b> | <b>19</b> | <b>20</b> |
| 28.3                              | 28.4      | 27.8      | 31.2      | 26.4            | 29.1      | 22.2      | 26.5      | 23.3             | 26.1      | 23.3      | 28.6      |
| <b>July</b>                       |           |           |           | <b>August</b>   |           |           |           | <b>September</b> |           |           |           |
| <b>17</b>                         | <b>18</b> | <b>19</b> | <b>20</b> | <b>17</b>       | <b>18</b> | <b>19</b> | <b>20</b> | <b>17</b>        | <b>18</b> | <b>19</b> | <b>20</b> |
| 21.5                              | 28.1      | 26.7      | 20.8      | 20.3            | 21.0      | 23.0      | 22.1      | 18.8             | 16.8      | 17.7      | 17.3      |
| <b>October</b>                    |           |           |           | <b>November</b> |           |           |           | <b>December</b>  |           |           |           |
| <b>17</b>                         | <b>18</b> | <b>19</b> | <b>20</b> | <b>17</b>       | <b>18</b> | <b>19</b> | <b>20</b> | <b>17</b>        | <b>18</b> | <b>19</b> | <b>20</b> |
| 15.8                              | 13.7      | 14.2      | 14.9      | 15.1            | 11.1      | 15.4      | 17.9      | 14.5             | 12.8      | 14.8      | 15.9      |

| <b>Median PM<sub>2.5</sub> (µg m<sup>-3</sup>)</b> |           |           |           |                 |           |           |           |                  |           |           |           |
|----------------------------------------------------|-----------|-----------|-----------|-----------------|-----------|-----------|-----------|------------------|-----------|-----------|-----------|
| <b>April</b>                                       |           |           |           | <b>May</b>      |           |           |           | <b>June</b>      |           |           |           |
| <b>17</b>                                          | <b>18</b> | <b>19</b> | <b>20</b> | <b>17</b>       | <b>18</b> | <b>19</b> | <b>20</b> | <b>17</b>        | <b>18</b> | <b>19</b> | <b>20</b> |
| 4.9                                                | 5.4       | 5.3       | 5.4       | 5.1             | 9.8       | 6.1       | 5.0       | 6.1              | 6.6       | 7.0       | 6.6       |
| <b>July</b>                                        |           |           |           | <b>August</b>   |           |           |           | <b>September</b> |           |           |           |
| <b>17</b>                                          | <b>18</b> | <b>19</b> | <b>20</b> | <b>17</b>       | <b>18</b> | <b>19</b> | <b>20</b> | <b>17</b>        | <b>18</b> | <b>19</b> | <b>20</b> |
| 8.1                                                | 8.1       | 7.6       | 6.3       | 8.0             | 9.7       | 6.3       | 5.7       | 10.8             | 5.3       | 6.3       | 5.7       |
| <b>October</b>                                     |           |           |           | <b>November</b> |           |           |           | <b>December</b>  |           |           |           |
| <b>17</b>                                          | <b>18</b> | <b>19</b> | <b>20</b> | <b>17</b>       | <b>18</b> | <b>19</b> | <b>20</b> | <b>17</b>        | <b>18</b> | <b>19</b> | <b>20</b> |
| 6.4                                                | 5.6       | 5.9       | 5.0       | 6.7             | 5.6       | 6.8       | 7.9       | 6.6              | 9.5       | 8.1       | 6.2       |

| <b>Median NO<sub>2</sub> (ppb)</b> |           |           |           |                 |           |           |           |                  |           |           |           |
|------------------------------------|-----------|-----------|-----------|-----------------|-----------|-----------|-----------|------------------|-----------|-----------|-----------|
| <b>April</b>                       |           |           |           | <b>May</b>      |           |           |           | <b>June</b>      |           |           |           |
| <b>17</b>                          | <b>18</b> | <b>19</b> | <b>20</b> | <b>17</b>       | <b>18</b> | <b>19</b> | <b>20</b> | <b>17</b>        | <b>18</b> | <b>19</b> | <b>20</b> |
| 10.9                               | 17.4      | 12.8      | 10.9      | 14.3            | 14.1      | 12.4      | 11.4      | 13.4             | 10.9      | 13.4      | 11.1      |
| <b>July</b>                        |           |           |           | <b>August</b>   |           |           |           | <b>September</b> |           |           |           |
| <b>17</b>                          | <b>18</b> | <b>19</b> | <b>20</b> | <b>17</b>       | <b>18</b> | <b>19</b> | <b>20</b> | <b>17</b>        | <b>18</b> | <b>19</b> | <b>20</b> |
| 12.7                               | 12.1      | 11.4      | 8.7       | 11.8            | 11.5      | 11.3      | 9.1       | 17.8             | 9.3       | 13.6      | 10.2      |
| <b>October</b>                     |           |           |           | <b>November</b> |           |           |           |                  |           |           |           |

| 17   | 18   | 19   | 20   | 17   | 18   | 19   | 20   | 17   | 18   | 19   | 20   |
|------|------|------|------|------|------|------|------|------|------|------|------|
| 16.5 | 13.4 | 14.9 | 13.5 | 16.4 | 16.0 | 17.7 | 14.7 | 21.5 | 19.9 | 18.2 | 17.1 |

| Median CO (ppm) |      |      |      |          |      |      |      |           |      |      |      |
|-----------------|------|------|------|----------|------|------|------|-----------|------|------|------|
| April           |      |      |      | May      |      |      |      | June      |      |      |      |
| 17              | 18   | 19   | 20   | 17       | 18   | 19   | 20   | 17        | 18   | 19   | 20   |
| 0.22            | 0.23 | 0.22 | 0.19 | 0.22     | 0.23 | 0.21 | 0.20 | 0.20      | 0.19 | 0.23 | 0.20 |
| July            |      |      |      | August   |      |      |      | September |      |      |      |
| 17              | 18   | 19   | 20   | 17       | 18   | 19   | 20   | 17        | 18   | 19   | 20   |
| 0.21            | 0.20 | 0.22 | 0.20 | 0.24     | 0.24 | 0.23 | 0.20 | 0.31      | 0.21 | 0.25 | 0.20 |
| October         |      |      |      | November |      |      |      |           |      |      |      |
| 17              | 18   | 19   | 20   | 17       | 18   | 19   | 20   | 17        | 18   | 19   | 20   |
| 0.25            | 0.20 | 0.21 | 0.22 | 0.23     | 0.23 | 0.21 | 0.25 | 0.25      | 0.25 | 0.23 | 0.22 |

**Table S17. Windsor Downtown (U)**

| <b>Median O<sub>3</sub> (ppb)</b> |             |             |             |                 |             |             |             |                  |             |             |             |
|-----------------------------------|-------------|-------------|-------------|-----------------|-------------|-------------|-------------|------------------|-------------|-------------|-------------|
| <b>April</b>                      |             |             |             | <b>May</b>      |             |             |             | <b>June</b>      |             |             |             |
| <b>2017</b>                       | <b>2018</b> | <b>2019</b> | <b>2020</b> | <b>2017</b>     | <b>2018</b> | <b>2019</b> | <b>2020</b> | <b>2017</b>      | <b>2018</b> | <b>2019</b> | <b>2020</b> |
| 32.0                              | 33.9        | 31.0        | 30.6        | 35.3            | 36.0        | 28.4        | 33.0        | 34.6             | 36.2        | 33.4        | 37.7        |
| <b>July</b>                       |             |             |             | <b>August</b>   |             |             |             | <b>September</b> |             |             |             |
| <b>17</b>                         | <b>18</b>   | <b>19</b>   | <b>20</b>   | <b>17</b>       | <b>18</b>   | <b>19</b>   | <b>20</b>   | <b>17</b>        | <b>18</b>   | <b>19</b>   | <b>20</b>   |
| 35.2                              | 34.9        | 34.8        | 35.9        | 30.5            | 34.0        | 31.1        | 31.7        | 24.3             | 24.6        | 27.8        | 25.7        |
| <b>October</b>                    |             |             |             | <b>November</b> |             |             |             | <b>December</b>  |             |             |             |
| <b>17</b>                         | <b>18</b>   | <b>19</b>   | <b>20</b>   | <b>17</b>       | <b>18</b>   | <b>19</b>   | <b>20</b>   | <b>17</b>        | <b>18</b>   | <b>19</b>   | <b>20</b>   |
| 21.4                              | 20.0        | 20.4        | 20.1        | 17.9            | 17.5        | 16.4        | 23.3        | 16.9             | 13.9        | 17.5        | 20.3        |

| <b>Median PM<sub>2.5</sub> (µg m<sup>-3</sup>)</b> |           |           |           |                 |           |           |           |                  |           |           |           |
|----------------------------------------------------|-----------|-----------|-----------|-----------------|-----------|-----------|-----------|------------------|-----------|-----------|-----------|
| <b>April</b>                                       |           |           |           | <b>May</b>      |           |           |           | <b>June</b>      |           |           |           |
| <b>17</b>                                          | <b>18</b> | <b>19</b> | <b>20</b> | <b>17</b>       | <b>18</b> | <b>19</b> | <b>20</b> | <b>17</b>        | <b>18</b> | <b>19</b> | <b>20</b> |
| 5.5                                                | 6.5       | 5.6       | 6.3       | 5.5             | 7.3       | 6.2       | 4.7       | 6.3              | 7.7       | 6.8       | 7.0       |
| <b>July</b>                                        |           |           |           | <b>August</b>   |           |           |           | <b>September</b> |           |           |           |
| <b>17</b>                                          | <b>18</b> | <b>19</b> | <b>20</b> | <b>17</b>       | <b>18</b> | <b>19</b> | <b>20</b> | <b>17</b>        | <b>18</b> | <b>19</b> | <b>20</b> |
| 8.0                                                | 8.6       | 8.0       | 8.0       | 8.3             | 9.0       | 6.3       | 5.3       | 8.0              | 6.3       | 6.2       | 6.5       |
| <b>October</b>                                     |           |           |           | <b>November</b> |           |           |           |                  |           |           |           |
| <b>17</b>                                          | <b>18</b> | <b>19</b> | <b>20</b> | <b>17</b>       | <b>18</b> | <b>19</b> | <b>20</b> | <b>17</b>        | <b>18</b> | <b>19</b> | <b>20</b> |
| 6.4                                                | 5.5       | 4.4       | 5.4       | 7.9             | 6.0       | 6.8       | 7.2       | 7.5              | 9.3       | 8.7       | 6.9       |

| <b>Median NO<sub>2</sub> (ppb)</b> |           |           |           |                 |           |           |           |                  |           |           |           |
|------------------------------------|-----------|-----------|-----------|-----------------|-----------|-----------|-----------|------------------|-----------|-----------|-----------|
| <b>April</b>                       |           |           |           | <b>May</b>      |           |           |           | <b>June</b>      |           |           |           |
| <b>17</b>                          | <b>18</b> | <b>19</b> | <b>20</b> | <b>17</b>       | <b>18</b> | <b>19</b> | <b>20</b> | <b>17</b>        | <b>18</b> | <b>19</b> | <b>20</b> |
| 8.1                                | 11.4      | 8.9       | 8.1       | 7.6             | 9.9       | 9.3       | 6.4       | 8.9              | 7.7       | 9.1       | 7.6       |
| <b>July</b>                        |           |           |           | <b>August</b>   |           |           |           | <b>September</b> |           |           |           |
| <b>17</b>                          | <b>18</b> | <b>19</b> | <b>20</b> | <b>17</b>       | <b>18</b> | <b>19</b> | <b>20</b> | <b>17</b>        | <b>18</b> | <b>19</b> | <b>20</b> |
| 7.9                                | 7.3       | 8.5       | 6.7       | 9.4             | 8.0       | 8.4       | 7.7       | 11.5             | 7.7       | 7.9       | 8.0       |
| <b>October</b>                     |           |           |           | <b>November</b> |           |           |           |                  |           |           |           |
| <b>17</b>                          | <b>18</b> | <b>19</b> | <b>20</b> | <b>17</b>       | <b>18</b> | <b>19</b> | <b>20</b> | <b>17</b>        | <b>18</b> | <b>19</b> | <b>20</b> |
| 11.4                               | 10.5      | 10.1      | 9.5       | 14.2            | 10.4      | 13.0      | 9.8       | 15.3             | 16.9      | 13.1      | 11.6      |



| <b>Median CO (ppm)</b> |           |           |           |                 |           |           |           |                  |           |           |           |
|------------------------|-----------|-----------|-----------|-----------------|-----------|-----------|-----------|------------------|-----------|-----------|-----------|
| <b>April</b>           |           |           |           | <b>May</b>      |           |           |           | <b>June</b>      |           |           |           |
| <b>17</b>              | <b>18</b> | <b>19</b> | <b>20</b> | <b>17</b>       | <b>18</b> | <b>19</b> | <b>20</b> | <b>17</b>        | <b>18</b> | <b>19</b> | <b>20</b> |
| 0.20                   | 0.23      | 0.22      | 0.20      | 0.20            | 0.25      | 0.23      | 0.18      | 0.21             | 0.18      | 0.21      | 0.18      |
| <b>July</b>            |           |           |           | <b>August</b>   |           |           |           | <b>September</b> |           |           |           |
| <b>17</b>              | <b>18</b> | <b>19</b> | <b>20</b> | <b>17</b>       | <b>18</b> | <b>19</b> | <b>20</b> | <b>17</b>        | <b>18</b> | <b>19</b> | <b>20</b> |
| 0.20                   | 0.23      | 0.22      | 0.18      | 0.23            | 0.25      | 0.21      | 0.21      | 0.25             | 0.21      | 0.21      | 0.20      |
| <b>October</b>         |           |           |           | <b>November</b> |           |           |           |                  |           |           |           |
| <b>17</b>              | <b>18</b> | <b>19</b> | <b>20</b> | <b>17</b>       | <b>18</b> | <b>19</b> | <b>20</b> | <b>17</b>        | <b>18</b> | <b>19</b> | <b>20</b> |
| 0.24                   | 0.21      | 0.20      | 0.21      | 0.24            | 0.22      | 0.20      | 0.22      | 0.24             | 0.29      | 0.23      | 0.21      |

**Table S18. Windsor West (U)**

| <b>Median O<sub>3</sub> (ppb)</b> |             |             |             |                 |             |             |             |                  |             |             |             |
|-----------------------------------|-------------|-------------|-------------|-----------------|-------------|-------------|-------------|------------------|-------------|-------------|-------------|
| <b>April</b>                      |             |             |             | <b>May</b>      |             |             |             | <b>June</b>      |             |             |             |
| <b>2017</b>                       | <b>2018</b> | <b>2019</b> | <b>2020</b> | <b>2017</b>     | <b>2018</b> | <b>2019</b> | <b>2020</b> | <b>2017</b>      | <b>2018</b> | <b>2019</b> | <b>2020</b> |
| 31.2                              | 34.4        | 33.8        | 29.6        | 33.9            | 36.8        | 29.1        | 29.5        | 33.3             | 34.6        | 34.1        | 36.7        |
| <b>July</b>                       |             |             |             | <b>August</b>   |             |             |             | <b>September</b> |             |             |             |
| <b>17</b>                         | <b>18</b>   | <b>19</b>   | <b>20</b>   | <b>17</b>       | <b>18</b>   | <b>19</b>   | <b>20</b>   | <b>17</b>        | <b>18</b>   | <b>19</b>   | <b>20</b>   |
| 34.3                              | 34.2        | 34.4        | 32.8        | 30.6            | 32.3        | 30.3        | 28.8        | 23.6             | 22.0        | 26.8        | 24.0        |
| <b>October</b>                    |             |             |             | <b>November</b> |             |             |             |                  |             |             |             |
| <b>17</b>                         | <b>18</b>   | <b>19</b>   | <b>20</b>   | <b>17</b>       | <b>18</b>   | <b>19</b>   | <b>20</b>   | <b>17</b>        | <b>18</b>   | <b>19</b>   | <b>20</b>   |
| 21.3                              | 19.1        | 20.3        | 19.5        | 17.3            | 17.2        | 16.7        | 20.9        | 18.6             | 14.0        | 18.6        | 18.0        |

| <b>Median PM<sub>2.5</sub> (µg m<sup>-3</sup>)</b> |           |           |           |                 |           |           |           |                  |           |           |           |
|----------------------------------------------------|-----------|-----------|-----------|-----------------|-----------|-----------|-----------|------------------|-----------|-----------|-----------|
| <b>April</b>                                       |           |           |           | <b>May</b>      |           |           |           | <b>June</b>      |           |           |           |
| <b>17</b>                                          | <b>18</b> | <b>19</b> | <b>20</b> | <b>17</b>       | <b>18</b> | <b>19</b> | <b>20</b> | <b>17</b>        | <b>18</b> | <b>19</b> | <b>20</b> |
| 5.8                                                | 7.0       | 6.4       | 8.4       | 5.6             | 8.8       | 6.0       | 6.4       | 7.3              | 7.7       | 7.7       | 9.3       |
| <b>July</b>                                        |           |           |           | <b>August</b>   |           |           |           | <b>September</b> |           |           |           |
| <b>17</b>                                          | <b>18</b> | <b>19</b> | <b>20</b> | <b>17</b>       | <b>18</b> | <b>19</b> | <b>20</b> | <b>17</b>        | <b>18</b> | <b>19</b> | <b>20</b> |
| 9.3                                                | 8.3       | 9.0       | 7.5       | 8.9             | 9.6       | 7.2       | 7.7       | 7.6              | 7.1       | 7.3       | 7.6       |
| <b>October</b>                                     |           |           |           | <b>November</b> |           |           |           |                  |           |           |           |
| <b>17</b>                                          | <b>18</b> | <b>19</b> | <b>20</b> | <b>17</b>       | <b>18</b> | <b>19</b> | <b>20</b> | <b>17</b>        | <b>18</b> | <b>19</b> | <b>20</b> |
| 7.0                                                | 6.5       | 7.4       | 7.2       | 9.3             | 5.5       | 9.7       | 7.2       | 7.8              | 10.5      | 11.8      | 8.8       |

| <b>Median NO<sub>2</sub> (ppb)</b> |           |           |           |                 |           |           |           |                  |           |           |           |
|------------------------------------|-----------|-----------|-----------|-----------------|-----------|-----------|-----------|------------------|-----------|-----------|-----------|
| <b>April</b>                       |           |           |           | <b>May</b>      |           |           |           | <b>June</b>      |           |           |           |
| <b>17</b>                          | <b>18</b> | <b>19</b> | <b>20</b> | <b>17</b>       | <b>18</b> | <b>19</b> | <b>20</b> | <b>17</b>        | <b>18</b> | <b>19</b> | <b>20</b> |
| 7.1                                | 8.3       | 8.3       | 7.5       | 8.4             | 7.6       | 8.9       | 4.8       | 8.8              | 6.9       | 8.8       | 7.2       |
| <b>July</b>                        |           |           |           | <b>August</b>   |           |           |           | <b>September</b> |           |           |           |
| <b>17</b>                          | <b>18</b> | <b>19</b> | <b>20</b> | <b>17</b>       | <b>18</b> | <b>19</b> | <b>20</b> | <b>17</b>        | <b>18</b> | <b>19</b> | <b>20</b> |
| 7.2                                | 6.6       | 7.3       | 6.6       | 9.7             | 5.6       | 8.0       | 8.0       | 9.5              | 7.5       | 8.3       | 7.0       |
| <b>October</b>                     |           |           |           | <b>November</b> |           |           |           |                  |           |           |           |
| <b>17</b>                          | <b>18</b> | <b>19</b> | <b>20</b> | <b>17</b>       | <b>18</b> | <b>19</b> | <b>20</b> | <b>17</b>        | <b>18</b> | <b>19</b> | <b>20</b> |
| 11.1                               | 9.0       | 10.1      | 8.6       | 11.9            | 9.4       | 13.1      | 9.0       | 12.8             | 13.9      | 11.4      | 9.6       |

**Table S19.** Summary of the *extra percentage decrease* observed in 2020 relative to 2017-2019 calculated from the percentage in pollutant levels in 2020 and 2017-2019 relative to January of the same year(s). Figures S10, 3, 4d-f and 5d-f show graphical representation of this extra decrease for selected sites. The statistically significant values are highlighted in p-values below 0.05 listed in parentheses.

| AQ station name <sup>a</sup><br>R = Rural<br>U = Urban | Pollutant                                  |                |             |                 |             |      |                      |           |                |                                         |              |                |
|--------------------------------------------------------|--------------------------------------------|----------------|-------------|-----------------|-------------|------|----------------------|-----------|----------------|-----------------------------------------|--------------|----------------|
|                                                        | NO <sub>2</sub> (ppb)                      |                |             | CO (ppm)        |             |      | O <sub>3</sub> (ppb) |           |                | PM <sub>2.5</sub> (µg m <sup>-3</sup> ) |              |                |
|                                                        | COVID-19 related decrease (%) <sup>b</sup> |                |             |                 |             |      |                      |           |                |                                         |              |                |
|                                                        | Apr                                        | May            | Jun         | Apr             | May         | Jun  | Apr                  | May       | Jun            | Apr                                     | May          | Jun            |
| Grand Bend (R)                                         | n.o.<br>(0.02)                             | n.o.           | n.o.        | No measurements |             |      | 3.2<br>(0)           | 4.2       | n.o.           | n.o.                                    | n.o.         | n.o.           |
| Guelph (U)                                             | 14<br>(0.044)                              | 13             | n.o.        | No measurements |             |      | n.o.                 | n.o.      | n.o.           | 3.7                                     | 35           | n.o.<br>(0.02) |
| Hamilton Downtown (U)                                  | 30                                         | 14             | 28          | 16<br>(0.01)    | n.o.        | 3    | n.o.                 | n.o.      | n.o.<br>(0.02) | n.o.                                    | 11           | n.o.           |
| Hamilton Mountain (U)                                  | 9                                          | n.o.           | 8           | No measurements |             |      | n.o.                 | 5         | n.o.<br>(0.03) | 6                                       | 20           | n.o.           |
| Hamilton West (U)                                      | 33                                         | 35             | 21          | No measurements |             |      | n.o.                 | n.o.      | n.o.<br>(0.01) | 5                                       | 35<br>(0.03) | n.o.           |
| Kitchener (U)                                          | 9                                          | 11<br>(0.04)   | 4           | No measurements |             |      | 6                    | 5         | n.o.           | n.o.                                    | 12           | n.o.           |
| London (U)                                             | 18<br>(0.01)                               | 10<br>(0.02)   | 8<br>(0.02) | No measurements |             |      | 2                    | 10        | n.o.           | 16<br>(0.01)                            | 5            | n.o.           |
| Ottawa Downtown (U)                                    | 3                                          | 2              | 3           | 12<br>(0)       | 7<br>(0.01) | 0    | n.o.                 | n.o.      | n.o.<br>(0.02) | n.o.                                    | 11<br>(0.03) | n.o.           |
| Parry Sound (U)                                        | 10                                         | 14             | n.o.        | No measurements |             |      | n.o.                 | n.o.      | n.o.           | 33                                      | 15           | n.o.<br>(0)    |
| Sarnia (U)                                             | 20<br>(0.02)                               | 10             | n.o.        | No measurements |             |      | 24<br>(0)            | 30<br>(0) | 4              | n.o.                                    | n.o.         | n.o.           |
| Toronto Downtown (U)                                   | 3                                          | n.o.<br>(0.01) | n.o.        | No measurements |             |      | n.o.                 | 14<br>(0) | n.o.           | n.o.                                    | 13           | n.o.<br>(0.03) |
| Toronto East (U)                                       | 10<br>(0.01)                               | 4              | 3           | No measurements |             |      | n.o.<br>(0.02)       | 8         | n.o.<br>(0)    | 0                                       | 9            | n.o.           |
| Toronto North (U)                                      | 11<br>(0.04)                               | n.o.           | n.o.        | No measurements |             |      | n.o.<br>(0.01)       | 10        | n.o.<br>(0)    | n.o.                                    | 16           | n.o.           |
| Toronto West (U)                                       | 13<br>(0.02)                               | 9              | 7           | 12<br>(0)       | 4           | n.o. | n.o.<br>(0.01)       | 12        | n.o.<br>(0.03) | n.o.                                    | 1            | n.o.           |
| Windsor Downtown (U)                                   | 4                                          | 12<br>(0)      | 1           | n.o.<br>(0.03)  | 2<br>(0.01) | n.o. | 4                    | n.o.      | n.o.           | n.o.                                    | 7<br>(0.04)  | n.o.           |
| Windsor West (U)                                       | 6                                          | 28<br>(0)      | 9           | No measurements |             |      | 19<br>(0)            | 12        | n.o.           | n.o.<br>(0.03)                          | n.o.         | n.o.           |

Notes. <sup>a</sup> See Table S2 for station type and Figure S1 for location. <sup>b</sup> % decrease in 2020 in a given month = (median in 2020 – median in 2017-2019)\*100% / (median in 2017-2019). See Figure S10 for examples. ‘n.o.’ = no decrease observed, on the other hand, an increase was observed in pollutant level in 2020 relative to 2017-2019.

**Table S20.** Summary of Average Annual Daily Traffic (AADT) in the City of Kitchener in 2020 compared to previous year.

| <b>Intersection</b>                    | <b>Dates</b>   | <b>Year</b> | <b>(a)<br/>Previous<br/>years<br/>AADT</b> | <b>(b)<br/>COVID<br/>(2020)<br/>AADT</b> | <b>(c)<br/>Difference,<br/>(a)-(b)</b> | <b>% Reduction<br/>of Volume<br/>%(c)/(a)</b> |
|----------------------------------------|----------------|-------------|--------------------------------------------|------------------------------------------|----------------------------------------|-----------------------------------------------|
| <b>Data from Early May</b>             |                |             |                                            |                                          |                                        |                                               |
| King Street & Bells Lane               | May 2 - May 21 | 2014        | 2862                                       | 1551                                     | 1311                                   | 45.8%                                         |
| Duke Street & Weber Street             | May 2 - May 21 | 2014        | 5300                                       | 1675                                     | 3625                                   | 68.4%                                         |
| Bingeman Street & Chapel Street        | May 2 - May 21 | 2016        | 4443                                       | 1622                                     | 2821                                   | 63.5%                                         |
| Duke Street West & Waterloo Street     | May 2 - May 21 | 2010        | 843                                        | 163                                      | 680                                    | 80.7%                                         |
| Young Street & Ontario Street          | May 2 - May 21 | 2012        | 8220                                       | 3398                                     | 4822                                   | 58.7%                                         |
| Water Street & David Street            | May 2 - May 21 | 2019        | 8992                                       | 5393                                     | 3599                                   | 40.0%                                         |
| Pandora Ave N & Fairview Avenue        | May 2 - May 21 | 2019        | 10469                                      | 5419                                     | 5050                                   | 48.2%                                         |
| East Avenue & Melrose Avenue           | May 2 - May 21 | 2011        | 4359                                       | 1491                                     | 2868                                   | 65.8%                                         |
| Aberdeen Road & Inwood Drive           | May 2 - May 21 | 2018        | 5287                                       | 2437                                     | 2850                                   | 53.9%                                         |
| St. Leger Street & Margaret Avenue     | May 2 - May 21 | 2018        | 4105                                       | 2409                                     | 1696                                   | 41.3%                                         |
| Rosemount Drive & Islington Avenue     | May 2 - May 21 | 2017        | 10743                                      | 4299                                     | 6444                                   | 60.0%                                         |
| <b>Sub total 1.</b>                    |                |             | <b>65623</b>                               | <b>29857</b>                             | <b>35766</b>                           | <b>54.5%</b>                                  |
| <b>Data from Late May - Early June</b> |                |             |                                            |                                          |                                        |                                               |
| McGarry Drive & Lorilee Cres           | May 23 - Jun 5 | 2019        | 7310                                       | 2912                                     | 4398                                   | 60.2%                                         |
| Warren Road & Stonybrook Drive         | May 23 - Jun 5 | 2017        | 3407                                       | 1674                                     | 1733                                   | 50.9%                                         |
| Wilderness Drive & Copper Leaf Street  | May 23 - Jun 5 | 2018        | 7013                                       | 3786                                     | 3227                                   | 46.0%                                         |
| Anvil Street & Tilt Drive              | May 23 - Jun 5 | 2016        | 10220                                      | 5066                                     | 5154                                   | 50.4%                                         |

|                                        |                |      |              |              |              |              |
|----------------------------------------|----------------|------|--------------|--------------|--------------|--------------|
| New Dundee Drive & Pieter Vos Drive    | May 23 - Jun 5 | 2019 | 5195         | 3276         | 1919         | 36.9%        |
| Windrush Trail & Winding Wood Crescent | May 23 - Jun 5 | 2018 | 4399         | 2632         | 1767         | 40.2%        |
| Shelley Drive & Siebert Avenue         | May 23 - Jun 5 | 2017 | 3993         | 2074         | 1919         | 48.1%        |
| Ninth Avenue & Woodhaven Road          | May 23 - Jun 5 | 2017 | 3173         | 2166         | 1007         | 31.7%        |
| <b>Sub total 2.</b>                    |                |      | <b>44710</b> | <b>23586</b> | <b>21124</b> | <b>47.2%</b> |

## Additional information on Methods.

### Statistical information.

The proposed median-based randomization test can be used not only to compare pre- and post-lockdown data, but also to measure the extent to which seasonal meteorology affects pollutant concentrations in a given month for the pre-lockdown reference years 2017-2019. That is, suppose that  $N_{2017}$ ,  $N_{2018}$ , and  $N_{2019}$  are daily weekday pollutant concentrations recorded in a given month of these years. Let  $R_{\text{obs}}$  denote the range (max minus min) between the three respective medians in the actual data, and  $R_{\text{rand}}$  the corresponding statistic for a random permutation of the data. Then under  $H_0$  that the data from all three years come from the same distribution, the p-value against  $H_0$  is the probability that  $R_{\text{rand}}$  exceeds  $R_{\text{obs}}$  where each permutation of the data is equally likely. Indeed, the range statistic  $R_{\text{obs}}$  can be used to compare differences between two or more groups. For the two-group comparison between 2020 and the reference years 2017-2019, the range statistic  $R_{\text{obs}}$  and the absolute difference in medians  $\Delta_{\text{obs}}$  are one and the same, as are their respective p-values.

It is worth noting that randomization tests such as ours do not necessarily rely on assumptions about iid sampling. Indeed, while classical significance tests must be interpreted in the context of repeated data collection, for the unique meteorological conditions underlying the comparison of 2020 data to reference years, such replications are conceptually infeasible — or at least not without modeling assumptions which cannot be verified with the small data samples available. In contrast, randomization tests have the ability to condition on the outcome of one-time events such as COVID-19, since the test probability  $\Pr(\Delta_{\text{rand}} > \Delta_{\text{obs}})$  is determined entirely by the set of all random permutations, and not by a statistical model which may or may not have generated the data (Ludbrook and Dudley, 1998). When such a model can be reasonably argued to exist, randomization test probabilities coincide with classical test p-values — i.e., 5% of repeated experiments will have  $p < 0.05$  when  $H_0$  is true — provided that the data generation mechanism is iid. When it is not, randomization tests generally do not produce classical p-values.<sup>8,11</sup> However, randomization p-values can be made asymptotically equivalent to classical ones under a wide range of non-iid settings, provided that the test statistic is subjected to an appropriate transformation. (Brunner and Munzel, 2000; Chung and Romano, 2013; Janssen, 1997; Neubert and Brunner, 2007) While we have not made such adjustments here due to the limited impact for small sample sizes (Chung and Romano, 2013), the connection to classical tests is highlighted for future large-sample air quality studies to enjoy the advantages of randomization tests for quantifying statistical significance.

## References.

- Brunner, E., Munzel, U., 2000. The Nonparametric Behrens-Fisher Problem: Asymptotic Theory and a Small-Sample Approximation. *Biometrical J.* 42, 17-25.
- Chung, E.Y., Romano, J.P., 2013. Exact and Asymptotically Robust Permutation Tests. *Ann. Stat.* 41, 484-507.
- Divine, G.W., Norton, J.H., Barón, A.E., Juárez-Colunga, E., 2018. The Wilcoxon-Mann-Whitney Procedure Fails as a Test of Medians. *Am. Stat.* 72, 278-286.
- Huang, F., Li, X., Wang, C., Xu, Q., Wang, W., Luo, Y., Tao, L., Gao, Q., Guo, J., Chen, S., Cao, K., Liu, L., Gao, N., Liu, X., Yang, K., Yan, A., Guo, X., 2015. PM2.5 Spatiotemporal Variations and the Relationship with Meteorological Factors during 2013-2014 in Beijing, China. *PLOS ONE* 10, e0141642.  
<https://doi.org/0141610.0141371/journal.pone.0141642>.
- Janssen, A., 1997. Studentized Permutation Tests for Non-I.i.d. Hypotheses and the Generalized Behrens-Fisher Problem. *Stat. Prob. Lett.* 36, 9-21.
- Le, T., Wang, Y., Liu, L., Wang, J., Yung, Y.L., Li, G., Seinfeld, J.H., 2020. Unexpected air pollution with marked emission reductions during the COVID-19 outbreak in China. *Science* 369, 702-706.
- Ludbrook, J., Dudley, H., 1998. Why Permutation Tests Are Superior to T and F Tests in Biomedical Research. *Am. Stat.* 52, 127-132.
- Mann, H.B., Whitney, D.R., 1947. On a Test of Whether One of Two Random Variables Is Stochastically Larger Than the Other. *Ann. Math. Stat.* 18, 50-60.
- MECP, 2017. Air Quality in Ontario Report Ministry of the Environment and Climate Change (currently Ministry of the Environment, Conservation and Parks (MEPC)), Toronto, ON.
- Neubert, K., Brunner, E., 2007. A Studentized Permutation Test for the Non-Parametric Behrens Fisher Problem. *Comp. Stat. Data. An.* 51, 5192-5204.
- Shi, X., Basseur, G.P., 2020. The Response in Air Quality to the Reduction of Chinese Economic Activities During the COVID-19 Outbreak. *Geophys. Res. Lett.* 47.
- Tanzer-Gruener, R., Li, J., Eilenberg, S.R., Robinson, A.L., Presto, A.A., 2020. Impacts of Modifiable Factors on Ambient Air Pollution: A Case Study of COVID-19 Shutdowns. *Environ. Sci. Technol. Lett.* 7, 554-559.
- Venter, Z.S., Aunan, K., Chowdhury, S., Lelieveld, J., 2020. COVID-19 lockdowns cause global air pollution declines. *PNAS* 117, 18984-18990.
- Wilcoxon, F., 1945. Individual Comparisons by Ranking Methods. *Biometrics Bull.* 1, 80-83.
- Zeb, N., Khokhar, M.F., Pozzer, A., Khan, S.A., 2019. Exploring the Temporal Trends and Seasonal Behaviour of Tropospheric Trace Gases over Pakistan by Exploiting Satellite Observations. *Atmos. Environ.* 198, 279-290.
